# Supplementary material
Source: publisher figshare collection journal article supplement (https://acs.figshare.com/ndownloader/files/3848734)
Supplement: Supplementary file 1 [file 3848734]

# Structural and Electronic Variations of $sp/sp^2$ Carbon-Based Bridges in Di- and Trinuclear Redox-Active Iron Complexes Bearing $Fe(diphosphine)_2X$ ( $X = I, NCS$ ) Moieties

Franziska Lissel, Olivier Blacque, Koushik Venkatesan and Heinz Berke\*

† Department of Chemistry, University of Zurich, Winterthurerstrasse 190, CH-8057 Zurich, Switzerland

\* hberke@chem.uzh.ch

|                              |     |
|------------------------------|-----|
| General Procedures.....      | S2  |
| Syntheses.....               | S3  |
| NMR - Studies.....           | S9  |
| Infrared Spectra.....        | S37 |
| X-Ray Diffraction Data.....  | S43 |
| Cyclic Voltammetry Data..... | S48 |
| DFT Calculations .....       | S52 |
| References.....              | S52 |

## General Procedures

Reagent grade toluene, pentane, diethyl ether and tetrahydrofuran were dried and distilled from sodium prior to use. Reagent grade benzene and dichloromethane were dried and distilled from  $\text{CaH}_2$ , acetonitrile from  $\text{P}_2\text{O}_5$ . Deuterated solvents were dried and distilled likewise.

The stannylated linkers 1,4-bis((trimethylstannylethynyl)benzene, 1,3-bis((trimethylstannyl)ethynyl)benzene, 4,4'-bis((trimethylstannyl)ethynyl)biphenyl, 2,5-bis((trimethylstannyl)ethynyl)thiophene and 1,3,5-tris((trimethylstannyl)ethynyl)benzene were obtained by lithiating the corresponding deprotected alkynes at low temperature and then reacting them with stoichiometric amounts of  $\text{Me}_3\text{SnCl}$ . The stannylated reagents were purified by two subsequent crystallizations from cold pentane. *Trans*- $\text{Fe}(\text{depe})_2\text{I}_2$  was synthesized as described in literature.<sup>1</sup> Commercially available NaSCN was recrystallized from methanol prior to use.

NMR spectra were measured on a Bruker Biospin at 500 MHz for  $^1\text{H}$ , 125.8 MHz for  $^{13}\text{C}\{^1\text{H}\}$  and 202.5 MHz for  $^{31}\text{P}\{^1\text{H}\}$ . Chemical shifts for  $^1\text{H}$  and  $^{13}\text{C}$  are given in ppm relative to the solvent<sup>2</sup> and for  $^{31}\text{P}$  relative to phosphoric acid. All NMR spectra were recorded at room temperature. IR spectra were measured using an ATR bridge and recorded on a Perkin-Elmer Spectrum Two FT-IR spectrometer. Raman spectra were recorded on a Renishaw Ramanscope spectrometer (514 nm). CHN elemental analyses were performed with a LECO CHN-932 microanalyzer. Cyclic voltammograms were obtained with a BAS 100W Voltammetric Analyzer (low volume cell). The cell was equipped with an Au working electrode and a Pt counter electrode, and an Ag reference electrode. All sample solutions were 0.1M in  $\text{Bu}_4\text{NPF}_6$  and recorded with a scan rate of 100 mV/s. Ferrocene was used as an external standard. A BAS 100W program was employed for the data analysis.

## Syntheses

### $[I-(depe)_2Fe-1,4-(C\equiv C-C_6H_4-C\equiv C)-Fe(depe)_2-I] \mathbf{1}$

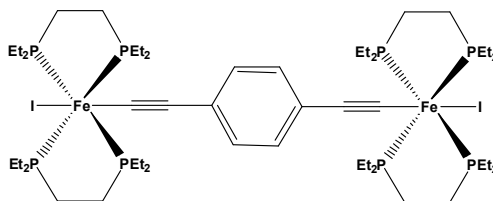

*Trans*-Fe(depe)<sub>2</sub>I<sub>2</sub> (289 mg, 0.4 mmol) and 1,4-bis((trimethylstannyl)ethynyl)benzene (95 mg, 0.21 mmol) were suspended in THF (10 mL) and heated to reflux for 12 h. The THF was removed *in vacuo* and the obtained solid washed with pentane/diethyl ether (1:1, 3 x 10 mL). The product was extracted with toluene (40 mL) and the solution filtered over diatomite. Drying *in vacuo* gave the title compound as a red solid.

Yield: 228 mg = 0.173 mmol = 86.7 %.

Crystals suitable for X-ray were grown by slow diffusion of pentane into a THF solution at rt.

**Anal. Calcd.:** C: 45.68; H: 7.67. **Found:** C: 45.91; H: 7.51. **IR** (ATR, cm<sup>-1</sup>): 2028 (vs, ν<sub>C≡C</sub>); 1489 (m, ν<sub>C=C</sub>). **Raman** (cm<sup>-1</sup>): 2030 (m, ν<sub>C≡C</sub>); 1586 (s, ν<sub>C=C</sub>). **<sup>1</sup>H NMR** (500 MHz, THF-d<sub>8</sub>): δ = 6.50 (s, 4H, Ar-H), 2.62 - 2.53 (m, 8H, CH<sub>2</sub>-CH<sub>3</sub>), 2.47 - 2.38 (m, 8H, CH<sub>2</sub>-CH<sub>3</sub>), 2.06 - 1.89 (m, 24H, CH<sub>2</sub>-CH<sub>3</sub> and CH<sub>2</sub>-CH<sub>2</sub>), 1.83 - 1.75 (m, 8H, CH<sub>2</sub>-CH<sub>3</sub>, overlapping with THF), 1.26 - 1.14 (m, 48H, CH<sub>2</sub>-CH<sub>3</sub>). **<sup>13</sup>C{<sup>1</sup>H} NMR** (125.8 MHz, THF-d<sub>8</sub>): δ = 129.9 (s, o-C), 125.6 (s, i-C), 124.15 (s, Fe-C≡C), 122.7 (p, <sup>2</sup>J<sub>C-P</sub> = 23.9 Hz, Fe-C≡C), 25.1 - 24.9 (m, CH<sub>2</sub>-CH<sub>3</sub>), 22.6 - 22.1 (m, CH<sub>2</sub>-CH<sub>2</sub>), 21.3 - 21.1 (m, CH<sub>2</sub>-CH<sub>3</sub>), 10.5 (d, <sup>2</sup>J<sub>C-P</sub> = 75.5 Hz, CH<sub>2</sub>-CH<sub>3</sub>). **<sup>31</sup>P{<sup>1</sup>H} NMR** (202.5 MHz, THF-d<sub>8</sub>): δ = 66.0 (s).

### $[I-(depe)_2Fe-1,3-(C\equiv C-C_6H_4-C\equiv C)-Fe(depe)_2-I] \mathbf{2}$

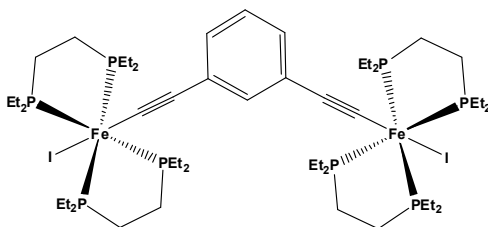

*Trans*-Fe(depe)<sub>2</sub>I<sub>2</sub> (289 mg, 0.4 mmol) and 1,3-bis((trimethylstannyl)ethynyl)benzene (95 mg, 0.21 mmol) were suspended in THF (10 mL) and heated to reflux for 12 h. The THF was removed *in vacuo* and the obtained pink solid washed with pentane (3 x 10 mL). The product was extracted with benzene (25 mL) and the solution filtered over a patch of diatomite. Drying *in vacuo* gave the title compound as a pink solid.

Yield: 238 mg = 0.181 mmol = 90.5 %.

Crystals suitable for X-ray were grown by slow diffusion of pentane into a THF solution at rt.

**Anal. Calcd.:** C: 45.68; H: 7.67. **Found:** C: 45.49; H: 7.53. **IR** (ATR,  $\text{cm}^{-1}$ ): 2036 (vs,  $\nu_{\text{C}\equiv\text{C}}$ ); 1571 (s,  $\nu_{\text{C}=\text{C}}$ ); 1551 (m,  $\nu_{\text{C}=\text{C}}$ ). **Raman** ( $\text{cm}^{-1}$ ): 2040 (s,  $\nu_{\text{C}\equiv\text{C}}$ ); 1574 (m,  $\nu_{\text{C}=\text{C}}$ ).  **$^1\text{H}$  NMR** (500 MHz,  $\text{THF-d}_8$ ):  $\delta$  = 6.62 (t, 1H,  $^3J_{\text{H-H}} = 7.5$  Hz, 5-Ar-H), 6.39 (s, 1H, 2-Ar-H), 6.31 (d, 1H,  $^3J_{\text{H-H}} = 7.5$  Hz, 4-Ar-H), 2.64 - 2.54 (m, 8H,  $\text{CH}_2\text{-CH}_3$ ), 2.50 - 2.38 (m, 8H,  $\text{CH}_2\text{-CH}_3$ ), 2.06 - 1.88 (m, 24H,  $\text{CH}_2\text{-CH}_3$  and  $\text{CH}_2\text{-CH}_2$ ), 1.83 - 1.75 (m, 8H,  $\text{CH}_2\text{-CH}_3$ ), 1.26 - 1.14 (m, 48H,  $\text{CH}_2\text{-CH}_3$ ).  **$^{13}\text{C}\{^1\text{H}\}$  NMR** (125.8 MHz,  $\text{THF-d}_8$ ):  $\delta$  = 132.1 (s, 2-Ar-C), 130.9 (p,  $^2J_{\text{C-P}} = 37.7$  Hz,  $\text{Fe-C}\equiv\text{C}$ ), 130.6 (s, 1-Ar-C), 127.9 (s, 5-Ar-C), 124.9 (s, 4-Ar-C), 123.8 ( $\text{Fe-C}\equiv\text{C}$ ), 25.1 - 24.8 (m,  $\text{CH}_2\text{-CH}_3$ ), 22.5 - 22.0 (m,  $\text{CH}_2\text{-CH}_2$ ), 21.3 - 20.9 (m,  $\text{CH}_2\text{-CH}_3$ ), 10.6 (d,  $^2J_{\text{C-P}} = 62.9$  Hz,  $\text{CH}_2\text{-CH}_3$ ).  **$^3\text{P}\{^1\text{H}\}$  NMR** (202.5 MHz,  $\text{THF-d}_8$ ):  $\delta$  = 66.1 (s).

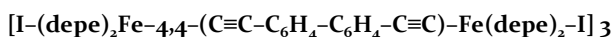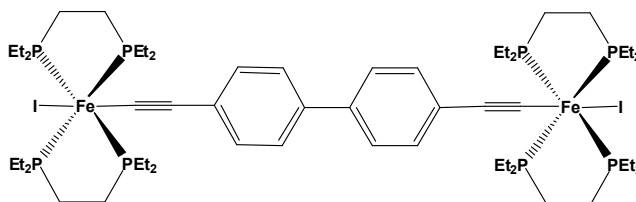

*Trans*-Fe(depe)<sub>2</sub>I<sub>2</sub> (289 mg, 0.4 mmol) and 4,4'-bis((trimethylstannyl)ethynyl)biphenyl (110 mg, 0.208 mmol) were suspended in THF (10 mL) and heated to reflux for 12 h. After cooling down to rt, a yellow-orange precipitate formed. Pentane (30 mL) was added and the supernatant solution removed. The precipitate was washed with pentane (3 x 10 mL). After extraction with hot toluene (90°C, 40 mL), the solution was filtered hot over a patch of diatomite. The toluene was removed *in vacuo* to give the title compound as an orange solid.

Yield: 251 mg = 0.181 mmol = 90.4 %.

**Anal. Calcd.:** C: 48.36; H: 7.54. **Found:** C: 48.56; H: 7.55. **IR** (ATR,  $\text{cm}^{-1}$ ): 2023 (vs,  $\nu_{\text{C}\equiv\text{C}}$ ); 1595 (m,  $\nu_{\text{C}=\text{C}}$ ); 1480 (s,  $\nu_{\text{C}=\text{C}}$ ). **Raman** ( $\text{cm}^{-1}$ ): 2040 (w,  $\nu_{\text{C}\equiv\text{C}}$ ); 1591 (vs,  $\nu_{\text{C}=\text{C}}$ ).  **$^1\text{H}$  NMR** (500 MHz,  $\text{CD}_2\text{Cl}_2$ ):  $\delta$  = 7.23 (d, 4H,  $^3J_{\text{H-H}} = 10.0$  Hz, Ar-H), 6.88 (d, 4H,  $^3J_{\text{H-H}} = 10.0$  Hz, Ar-H), 2.63 - 2.51 (m, 8H,  $\text{CH}_2\text{-CH}_3$ ), 2.10 - 1.90 (m, 24 H,  $\text{CH}_2\text{-CH}_3$  and  $\text{CH}_2\text{-CH}_2$ ), 1.88 - 1.79 (m, 8H,  $\text{CH}_2\text{-CH}_3$ ), 1.32 - 1.17 (m, 48H,  $\text{CH}_2\text{-CH}_3$ ).  **$^{13}\text{C}\{^1\text{H}\}$  NMR** (125.8 MHz,  $\text{CD}_2\text{Cl}_2$ ):  $\delta$  = 135.0 (s, Ar-C), 130.3 (s, Ar-C-H), 128.6 (s, Ar-C), 126.1 (s, Ar-C-H), 123.3 (s,  $\text{Fe-C}\equiv\text{C}$ ), 24.4 - 24.0 (m,  $\text{CH}_2\text{-CH}_3$ ), 21.8 - 21.3 (m,  $\text{CH}_2\text{-CH}_2$ ), 20.5 - 20.2 (m,  $\text{CH}_2\text{-CH}_3$ ), 10.3 (d,  $^2J_{\text{C-P}} = 75.5$  Hz,  $\text{CH}_2\text{-CH}_3$ ).  **$^3\text{P}\{^1\text{H}\}$  NMR** (202.5 MHz,  $\text{CD}_2\text{Cl}_2$ ):  $\delta$  = 64.8 (s).

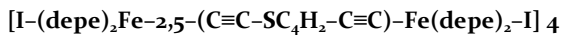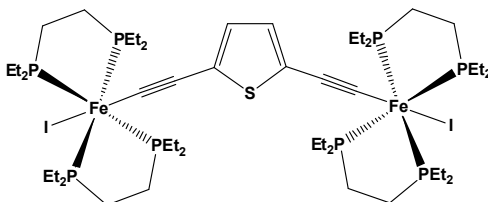

*Trans*-Fe(depe)<sub>2</sub>I<sub>2</sub> (289 mg, 0.4 mmol) and 2,5-bis((trimethylstannyl)ethynyl)thiophene (96 mg, 0.21 mmol) were suspended in toluene (10 mL) and heated to 80°C for 12 h. After cooling down, the brown solution was concentrated to 5 mL before pentane was added (20 mL), causing a precipitate to form. The supernatant solution was removed and the precipitate washed with pentane (3 x 10 mL). The product was extracted with benzene (20 mL) and the solution filtered over a patch of diatomite. Drying *in vacuo* gave the title compound as a brown solid.

Yield: 234 mg = 0.177 mmol = 88.4 %.

Crystals suitable for X-ray were grown in benzene/pentane at rt.

**Anal. Calcd.:** C: 43.65; H: 7.48. **Found:** C: 43.81; H: 7.51. **IR** (ATR, cm<sup>-1</sup>): 2034 (s, ν<sub>C≡C</sub>); 1502 (w, ν<sub>C=C</sub>). **Raman** (cm<sup>-1</sup>): 2032 (m, ν<sub>C≡C</sub>); 1439 (vs, ν<sub>C=C</sub>). **<sup>1</sup>H NMR** (500 MHz, C<sub>6</sub>D<sub>6</sub>): δ = 6.38 (s, 2H, 3-Thiophene-H), 2.72 - 2.62 (m, 8H, CH<sub>2</sub>-CH<sub>3</sub>), 2.44 - 2.33 (m, 8H, CH<sub>2</sub>-CH<sub>3</sub>), 1.92 - 1.79 (m, 16H, CH<sub>2</sub>-CH<sub>3</sub> and CH<sub>2</sub>-CH<sub>2</sub>), 1.77 - 1.61 (m, 16H, CH<sub>2</sub>-CH<sub>3</sub> and CH<sub>2</sub>-CH<sub>2</sub>), 1.11 - 1.02 (m, 48H, CH<sub>2</sub>-CH<sub>3</sub>). **<sup>13</sup>C{<sup>1</sup>H} NMR** (125.8 MHz, C<sub>6</sub>D<sub>6</sub>): δ = 137.6 (p, <sup>2</sup>J<sub>C-P</sub> = 28.9 Hz, Fe-C≡C), 125.4 (s, Fe-C≡C), 123.1 (s, 3-Thiophene-C), 115.4 (s, 2-Thiophene-C), 24.5 - 24.3 (m, CH<sub>2</sub>-CH<sub>3</sub>), 22.0 - 21.5 (m, CH<sub>2</sub>-CH<sub>2</sub>), 20.9 - 20.6 (m, CH<sub>2</sub>-CH<sub>3</sub>), 10.3 (d, <sup>2</sup>J<sub>C-P</sub> = 62.9 Hz, CH<sub>2</sub>-CH<sub>3</sub>). **<sup>31</sup>P{<sup>1</sup>H} NMR** (202.5 MHz, C<sub>6</sub>D<sub>6</sub>): δ = 67.9 (s).

**[{I-(depe)<sub>2</sub>Fe-C≡C-}]<sub>3</sub>-(1,3,5-C<sub>6</sub>H<sub>3</sub>) 5**

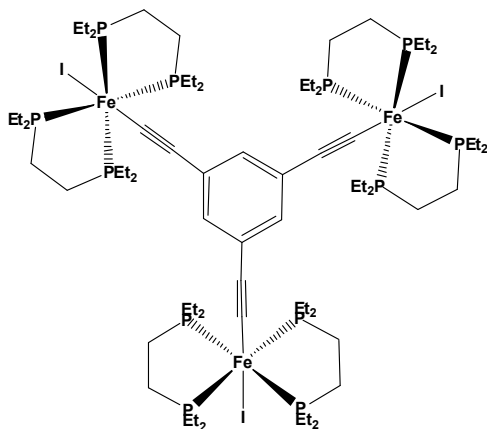

*Trans*-Fe(depe)<sub>2</sub>I<sub>2</sub> (217 mg, 0.3 mmol) and 1,3,5-tris((trimethylstannyl)ethynyl)benzene (67 mg, 0.105 mmol) were suspended in THF (50 mL) and heated to reflux for 12 h. The red solution was then filtered hot over a patch of diatomite and concentrated to a volume of 20 mL, causing a pink precipitate to form. The supernatant solution was removed and the precipitate washed with diethyl ether (3 x 10 mL). Drying *in vacuo* gave the title compound as a pink solid.

Yield: 180 mg = 0.0931 mmol = 93.1 %.

**Anal. Calcd.:** C: 44.74; H: 7.67. **Found:** C: 44.95; H: 7.46. **IR** (ATR, cm<sup>-1</sup>): 2046 (vs, ν<sub>C≡C</sub>); 1551 (vs, ν<sub>C=C</sub>). **Raman** (cm<sup>-1</sup>): 2049 (s, ν<sub>C≡C</sub>); 1561 (m, ν<sub>C=C</sub>). **<sup>1</sup>H NMR** (500 MHz, CD<sub>2</sub>Cl<sub>2</sub>): δ = 5.94 (s, 3H, Ar-H), 2.55 - 2.44 (m, 12H, CH<sub>2</sub>-CH<sub>3</sub>), 2.40 - 2.27 (m, 12H, CH<sub>2</sub>-CH<sub>3</sub>), 2.00 - 1.84 (m, 32H, CH<sub>2</sub>-CH<sub>3</sub> and CH<sub>2</sub>-CH<sub>2</sub>), 1.76 - 1.67 (m, 12H, CH<sub>2</sub>-CH<sub>3</sub>), 1.20 - 1.12 (m, 72H, CH<sub>2</sub>-CH<sub>3</sub>). **<sup>13</sup>C{<sup>1</sup>H} NMR** (125.8 MHz, CD<sub>2</sub>Cl<sub>2</sub>): δ = 126.3 (s, Ar-C-H), 24.8 - 24.2 (m, CH<sub>2</sub>-CH<sub>3</sub>), 22.1 - 21.5 (m, CH<sub>2</sub>-CH<sub>2</sub>), 20.7 - 20.1 (m, CH<sub>2</sub>-CH<sub>3</sub>), 10.4 (d, <sup>2</sup>J<sub>C-P</sub> = 75.5 Hz, CH<sub>2</sub>-CH<sub>3</sub>). **<sup>31</sup>P{<sup>1</sup>H} NMR** (202.5 MHz, CD<sub>2</sub>Cl<sub>2</sub>): δ = 66.5 (s).

[SCN-(depe)<sub>2</sub>Fe-1,4-(C≡C-C<sub>6</sub>H<sub>4</sub>-C≡C)-Fe(depe)<sub>2</sub>-NCS] 6

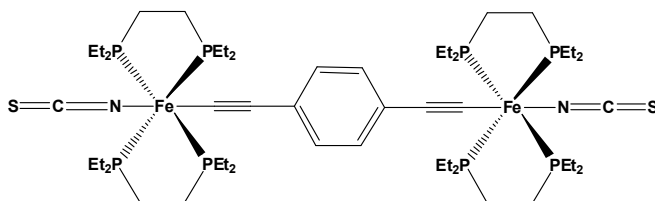

Compound **1** (66 mg, 0.05 mmol) and NaSCN (81 mg, 1 mmol) were dispersed in acetonitrile (15 mL) and heated to reflux for 12 h. Complex **1** gradually dissolved to give a yellow solution. The solution was concentrated to 5 mL, causing a yellow precipitate to form. The precipitate was filtered off using a patch of diatomite and washed with acetonitrile (3 x 5 mL). The product, a yellow solid, was extracted with benzene (40 mL) and dried *in vacuo*.

Yield: 54.1 mg = 0.046 mmol = 92.0 %.

Crystals suitable for X-ray were grown by slow diffusion of pentane into a THF solution at rt.

**Anal. Calcd.:** C: 53.06; H: 8.56; N: 2.38. **Found:** C: 52.80; H: 8.61; N: 2.42. **IR** (ATR, cm<sup>-1</sup>): 2092 (s, ν<sub>C=N</sub>); 2044 (s, ν<sub>C≡C</sub>); 1489 (m, ν<sub>C=C</sub>). **Raman** (cm<sup>-1</sup>): 2043 (m, ν<sub>C≡C</sub>); 1590 (s, ν<sub>C=C</sub>). **<sup>1</sup>H NMR** (500 MHz, CD<sub>2</sub>Cl<sub>2</sub>): δ = 6.50 (s, 4H, Ar-H), 2.29 - 2.20 (m, 8H, CH<sub>2</sub>-CH<sub>3</sub>), 1.95 - 1.72 (m, 40H, CH<sub>2</sub>-CH<sub>3</sub> and CH<sub>2</sub>-CH<sub>2</sub>), 1.24 - 1.14 (m, 48H, CH<sub>2</sub>-CH<sub>3</sub>). **<sup>13</sup>C{<sup>1</sup>H} NMR** (125.8 MHz, CD<sub>2</sub>Cl<sub>2</sub>): δ = 139.5 (s, Fe-N=C=S), 129.6 (s, o-C), 127.7 (p, <sup>2</sup>J<sub>C-P</sub> = 25.2 Hz, Fe-C≡C), 124.9 (s, i-C), 120.6 (s, Fe-C≡C), 21.3 - 20.7 (m, CH<sub>2</sub>-CH<sub>3</sub>), 20.0 - 19.6 (m, CH<sub>2</sub>-CH<sub>2</sub> and CH<sub>2</sub>-CH<sub>3</sub>), 9.5 (d, <sup>2</sup>J<sub>C-P</sub> = 37.7 Hz, CH<sub>2</sub>-CH<sub>3</sub>). **<sup>31</sup>P{<sup>1</sup>H} NMR** (202.5 MHz, CD<sub>2</sub>Cl<sub>2</sub>): δ = 73.8 (s).

[SCN-(depe)<sub>2</sub>Fe-1,3-(C≡C-C<sub>6</sub>H<sub>4</sub>-C≡C)-Fe(depe)<sub>2</sub>-NCS] 7

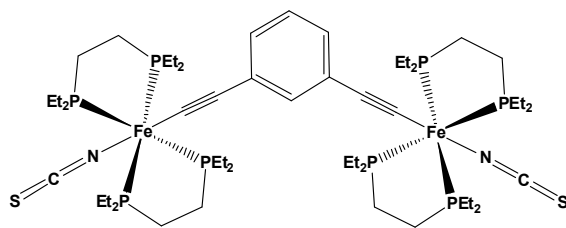

Compound **2** (66 mg, 0.05 mmol) and NaSCN (81 mg, 1 mmol) were dispersed in acetonitrile (15 mL) and heated to reflux for 5 h, yielding a yellow solution. The acetonitrile was removed *in vacuo* and the resulting solid washed with diethyl ether (3 x 5 mL). The product extracted with benzene/pentane (2:1, 40 mL). The solution was filtered over a patch of diatomite. Drying *in vacuo* gave the title compound as yellow solid.

Yield: 53.6 mg = 0.0455 mmol = 91.1 %.

**Anal. Calcd.:** C: 53.06; H: 8.56; N: 2.38. **Found:** C: 53.31; H: 8.47; N: 2.15. **IR** (ATR, cm<sup>-1</sup>): 2092 (s, ν<sub>C=N</sub>); 2041 (vs, ν<sub>C≡C</sub>); 1574 (s, ν<sub>C=C</sub>); 1552 (m, ν<sub>C=C</sub>). **Raman** (cm<sup>-1</sup>): 2097 (m, ν<sub>C=N</sub>); 2040 (vs, ν<sub>C≡C</sub>); 1578 (m, ν<sub>C=C</sub>); 1552 (w, ν<sub>C=C</sub>). **<sup>1</sup>H NMR** (500 MHz, THF-d<sub>8</sub>): δ = 6.59 (t, 1H, <sup>3</sup>J<sub>H-H</sub> = 7.5 Hz, 5-Ar-H), 6.35 (s, 1H, 2-Ar-H), 6.31 (d, 1H, <sup>3</sup>J<sub>H-H</sub> = 10.0 Hz, 4-Ar-H), 2.38 - 2.26 (m, 8H, CH<sub>2</sub>-CH<sub>3</sub>), 2.00 - 1.79 (m, 40H, CH<sub>2</sub>-CH<sub>3</sub> and CH<sub>2</sub>-CH<sub>2</sub>), 1.27 - 1.18 (m, 48H, CH<sub>2</sub>-CH<sub>3</sub>). **<sup>13</sup>C{<sup>1</sup>H} NMR** (125.8 MHz, THF-d<sub>8</sub>): δ = 142.8 (s, Fe-N=C=S), 132.3 (s, 2-Ar-C), 130.3 (s, 1-Ar-C), 127.9 (s, 5-Ar-C), 126.8 (p, <sup>2</sup>J<sub>C-P</sub> = 25.2 Hz, Fe-

$\text{C}\equiv\text{C}$ ), 125.2 (s, 4-Ar-C), 121.1 (Fe-C $\equiv\text{C}$ ), 21.8 - 21.3 (m, CH<sub>2</sub>-CH<sub>3</sub>), 20.8 - 20.5 (m, CH<sub>2</sub>-CH<sub>2</sub>), 20.4 - 20.2 (m, CH<sub>2</sub>-CH<sub>3</sub>), 9.7 (d, <sup>2</sup>J<sub>C-P</sub> = 50.3 Hz, CH<sub>2</sub>-CH<sub>3</sub>). <sup>31</sup>P{<sup>1</sup>H} NMR (202.5 MHz, THF-d<sub>8</sub>): δ = 74.4 (s).

[SCN-(depe)<sub>2</sub>Fe-4,4'-(C≡C-C<sub>6</sub>H<sub>4</sub>-C<sub>6</sub>H<sub>4</sub>-C≡C)-Fe(depe)<sub>2</sub>-NCS] **8**

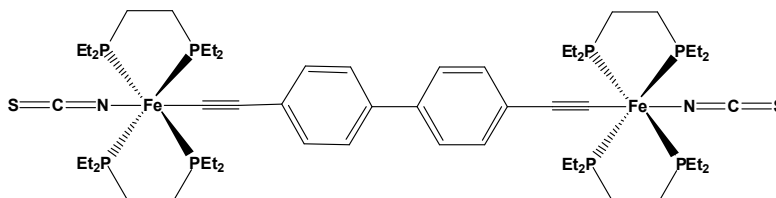

Compound **3** (70 mg, 0.05 mmol) and NaSCN (81 mg, 1 mmol) were dispersed in acetonitrile (15 mL) and heated to reflux for 12 h. The components never fully dissolved over the course of the reaction, a yellow precipitate was always present. The solution was concentrated to 5 mL to promote further precipitation. The solid was filtered off using a patch of diatomite and washed with acetonitrile (3 x 5 mL). The product, a yellow-orange solid, was extracted with benzene (40 mL) and dried *in vacuo*.

Yield: 58 mg = 0.047 mmol = 93.2 %.

Crystals suitable for X-ray were grown by slow evaporation of a THF/acetonitrile solution at rt.

**Anal. Calcd.:** C: 55.59; H: 8.37; N: 2.24. **Found:** C: 55.78; H: 8.31; N: 2.16. **IR** (ATR, cm<sup>-1</sup>): 2094 (s, ν<sub>C=N</sub>); 2034 (vs, ν<sub>C≡C</sub>); 1596 (s, ν<sub>C=C</sub>); 1481 (s, ν<sub>C=C</sub>). **Raman** (cm<sup>-1</sup>): 2045 (w, ν<sub>C≡C</sub>); 1591 (vs, ν<sub>C=C</sub>); 1522 (vw, ν<sub>C=C</sub>). **<sup>1</sup>H NMR** (500 MHz, CD<sub>2</sub>Cl<sub>2</sub>): δ = 7.19 (d, 4H, <sup>3</sup>J<sub>H-H</sub> = 8.0 Hz, Ar-H), 6.84 (d, 4H, <sup>3</sup>J<sub>H-H</sub> = 8.0 Hz, Ar-H), 2.37 - 2.25 (m, 8H, CH<sub>2</sub>-CH<sub>3</sub>), 2.06 - 1.75 (m, 40H, CH<sub>2</sub>-CH<sub>3</sub> and CH<sub>2</sub>-CH<sub>2</sub>), 1.30 - 1.13 (m, 48H, CH<sub>2</sub>-CH<sub>3</sub>). **<sup>13</sup>C{<sup>1</sup>H} NMR** (125.8 MHz, CD<sub>2</sub>Cl<sub>2</sub>): δ = 139.9 (s, Fe-N=C=S), 135.5 (s, Ar-C), 132.2 (p, <sup>2</sup>J<sub>C-P</sub> = 28.3 Hz, Fe-C≡C), 130.4 (s, Ar-C-H), 128.7 (s, Ar-C), 126.2 (s, Ar-C-H), 120.3 (s, Fe-C≡C), 21.4 - 21.0 (m, CH<sub>2</sub>-CH<sub>3</sub>), 20.2 - 19.9 (m, CH<sub>2</sub>-CH<sub>2</sub>), 19.9 - 19.7 (m, CH<sub>2</sub>-CH<sub>3</sub>), 9.6 (d, <sup>2</sup>J<sub>C-P</sub> = 62.9 Hz, CH<sub>2</sub>-CH<sub>3</sub>). **<sup>31</sup>P{<sup>1</sup>H} NMR** (202.5 MHz, CD<sub>2</sub>Cl<sub>2</sub>): δ = 73.9 (s).

[SCN-(depe)<sub>2</sub>Fe-2,5'-(C≡C-SC<sub>4</sub>H<sub>2</sub>-C≡C)-Fe(depe)<sub>2</sub>-NCS] **9**

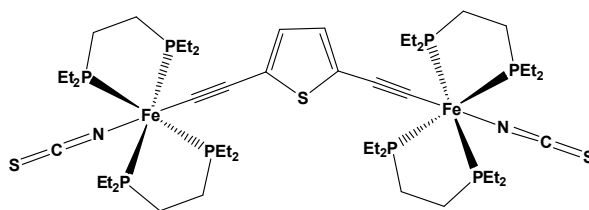

Compound **4** (66 mg, 0.05 mmol) and NaSCN (81 mg, 1 mmol) were dispersed in acetonitrile (15 mL) and heated to reflux for 12 h, yielding a brown solution. The acetonitrile was removed *in vacuo* and the resulting solid washed with cold diethyl ether (-20°C, 3 x 5 mL). Then the product was extracted with benzene/pentane (2:1; 40 mL). The solution was filtered over a patch of diatomite. Drying *in vacuo* gave the title compound as yellow-brown solid.

Yield: 57 mg = 0.049 mmol = 97.0 %

Crystals suitable for X-ray were grown by slow diffusion of pentane into a benzene solution at rt.

**Anal. Calcd.:** C: 50.76; H: 8.35; N: 2.37. **Found:** C: 50.71; H: 8.31; N: 2.30. **IR** (ATR,  $\text{cm}^{-1}$ ): 2094 (s,  $\nu_{\text{C}=\text{N}}$ ); 2031 (s,  $\nu_{\text{C}\equiv\text{C}}$ ); 1503 (w,  $\nu_{\text{C}=\text{C}}$ ). **Raman** ( $\text{cm}^{-1}$ ): 2097 (w,  $\nu_{\text{C}=\text{N}}$ ); 2036 (m,  $\nu_{\text{C}\equiv\text{C}}$ ); 1434 (vs,  $\nu_{\text{C}=\text{C}}$ ).  **$^1\text{H}$  NMR** (500 MHz,  $\text{C}_6\text{D}_6$ ):  $\delta$  = 6.24 (s, 2H, 4-Thiophene-H), 2.14 - 2.07 (m, 8H,  $\text{CH}_2\text{-CH}_3$ ), 1.90 - 1.83 (m, 8H,  $\text{CH}_2\text{-CH}_3$ ), 1.61 - 1.45 (m, 32H,  $\text{CH}_2\text{-CH}_3$  and  $\text{CH}_2\text{-CH}_2$ ), 1.03 - 0.94 (m, 48H,  $\text{CH}_2\text{-CH}_3$ ).  **$^{13}\text{C}\{^1\text{H}\}$  NMR** (125.8 MHz,  $\text{C}_6\text{D}_6$ ):  $\delta$  = 142.5 (2, Fe-N=C=S), 133.6 (p,  $^2J_{\text{C-P}}$  = 25.2 Hz, Fe-C $\equiv$ C), 125.2 (s, 3-Thiophene-C), 123.4 (s, Fe-C $\equiv$ C), 112.5 (s, 2-Thiophene-C), 21.1 - 20.0 (m,  $\text{CH}_2\text{-CH}_3$ ), 20.0 - 19.7 (m,  $\text{CH}_2\text{-CH}_2$ ), 19.7 - 19.5 (m,  $\text{CH}_2\text{-CH}_3$ ), 9.3 (d,  $^2J_{\text{C-P}}$  = 37.7 Hz,  $\text{CH}_2\text{-CH}_3$ ).  **$^{31}\text{P}\{^1\text{H}\}$  NMR** (202.5 MHz,  $\text{C}_6\text{D}_6$ ):  $\delta$  = 74.0 (s).

**$[[\text{SCN}-(\text{depe})_2\text{Fe-C}\equiv\text{C-}]_3-(1,3,5\text{-C}_6\text{H}_3)]$  10**

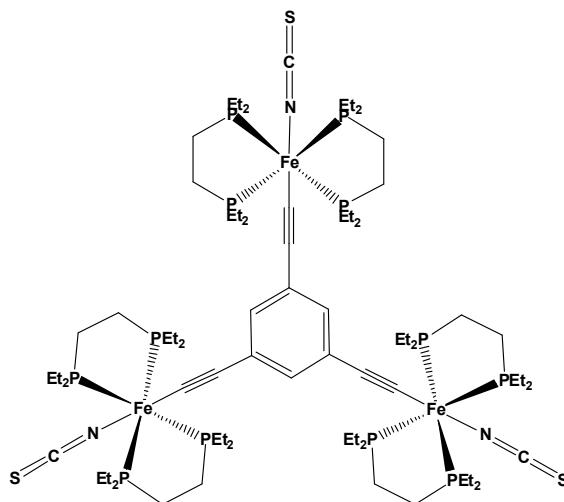

Compound **5** (97 mg, 0.05 mmol) and NaSCN (122 mg, 1.5 mmol) were dispersed in acetonitrile (15 mL) and heated to reflux for 5 h. The pink complex **5** gradually dissolved to give a yellow solution. The solution was concentrated to 5 mL, causing a yellow precipitate to form. The precipitate was filtered off using a patch of diatomite and washed with acetonitrile (3 x 5 mL). The product, a yellow solid, was extracted with benzene (40 mL) and dried *in vacuo*.

Yield: 83 mg = 0.048 mmol = 96.2%.

**Anal. Calcd.:** C: 52.18; H: 8.58; N: 2.43. **Found:** C: 52.38; H: 8.45; N: 2.31. **IR** (ATR,  $\text{cm}^{-1}$ ): 2096 (vs,  $\nu_{\text{C}=\text{N}}$ ); 2043 (vs,  $\nu_{\text{C}\equiv\text{C}}$ ); 1552 (s,  $\nu_{\text{C}=\text{C}}$ ). **Raman** ( $\text{cm}^{-1}$ ): 2101 (m,  $\nu_{\text{C}=\text{N}}$ ); 2053 (vs,  $\nu_{\text{C}\equiv\text{C}}$ ); 1556 (m, br, sh at 1575,  $\nu_{\text{C}=\text{C}}$ ).  **$^1\text{H}$  NMR** (500 MHz, THF- $d_8$ ):  $\delta$  = 5.93 (s, 3H, Ar-H), 2.35 - 2.24 (m, 12H,  $\text{CH}_2\text{-CH}_3$ ), 1.96 - 1.88 (m, 24H,  $\text{CH}_2\text{-CH}_3$ ), 1.86 - 1.77 (m, 36H,  $\text{CH}_2\text{-CH}_3$  and  $\text{CH}_2\text{-CH}_2$ ), 1.24 - 1.17 (m, 72H,  $\text{CH}_2\text{-CH}_3$ ).  **$^{13}\text{C}\{^1\text{H}\}$  NMR** (125.8 MHz, THF- $d_8$ ):  $\delta$  = 142.7 (s, Fe-N=C=S), 129.6 (s, Ar-C $\equiv$ C), 127.5 (s, Ar-C-H), 123.8 (p,  $^2J_{\text{C-P}}$  = 28.3 Hz, Fe-C $\equiv$ C), 121.5 (s, Fe-C $\equiv$ C), 21.5 - 21.3 (m,  $\text{CH}_2\text{-CH}_2$ ), 20.7 - 20.4 (m,  $\text{CH}_2\text{-CH}_3$ ), 9.6 (d,  $^2J_{\text{C-P}}$  = 62.9 Hz,  $\text{CH}_2\text{-CH}_3$ ).  **$^{31}\text{P}\{^1\text{H}\}$  NMR** (202.5 MHz, THF- $d_8$ ):  $\delta$  = 74.6 (s).



## NMR - Studies

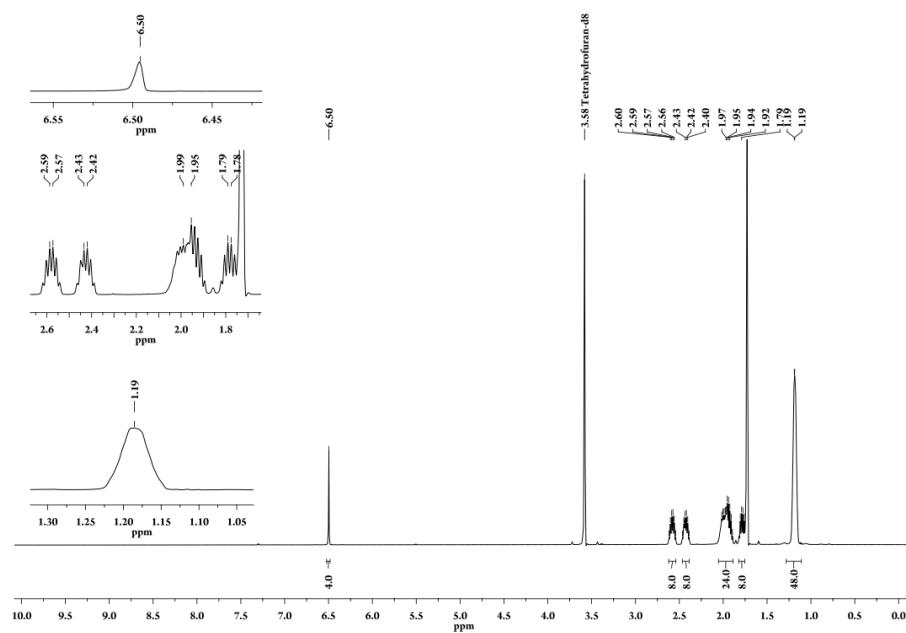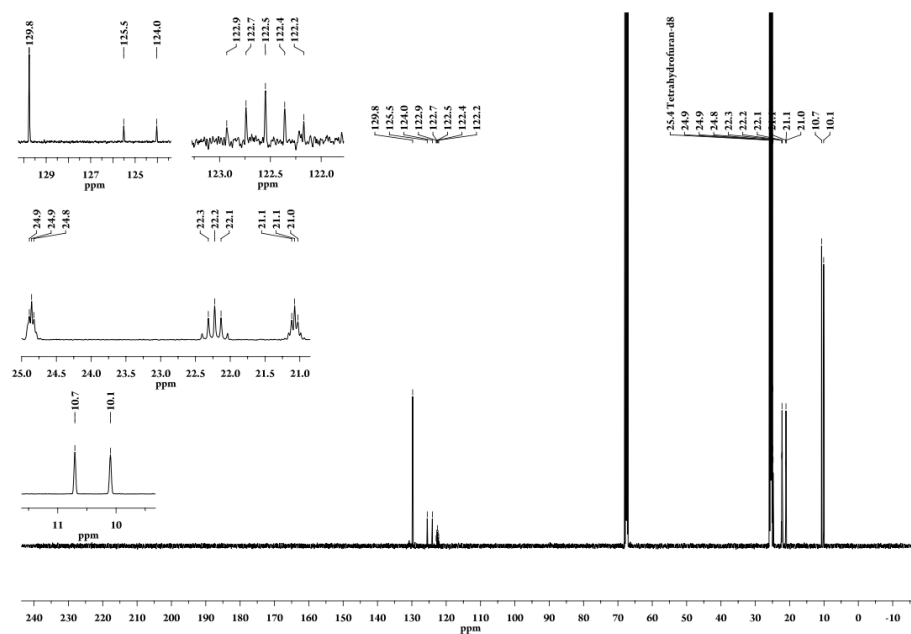

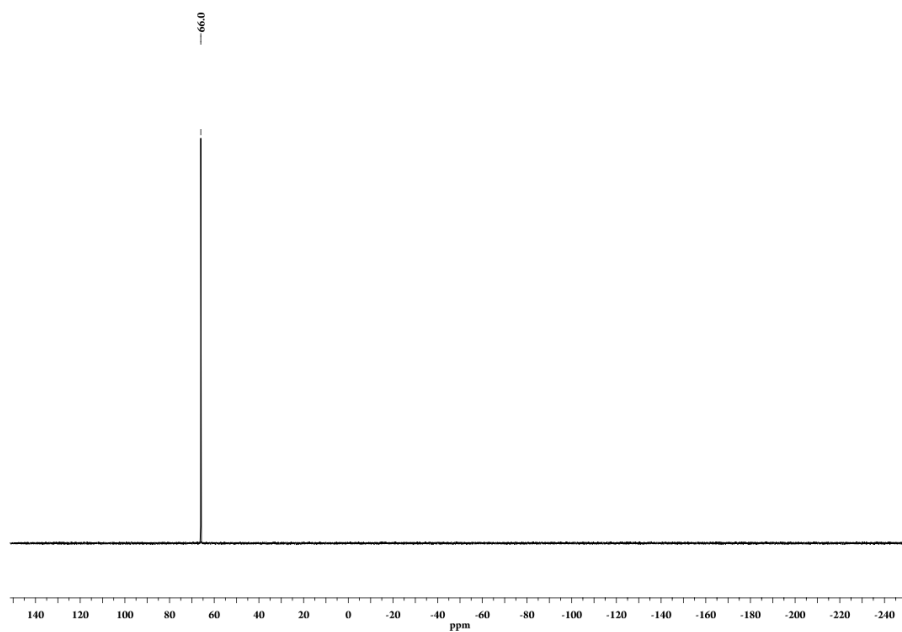

Figure S3.  $^{31}\text{P}\{^1\text{H}\}$  NMR of **1** in THF- $\text{d}_8$

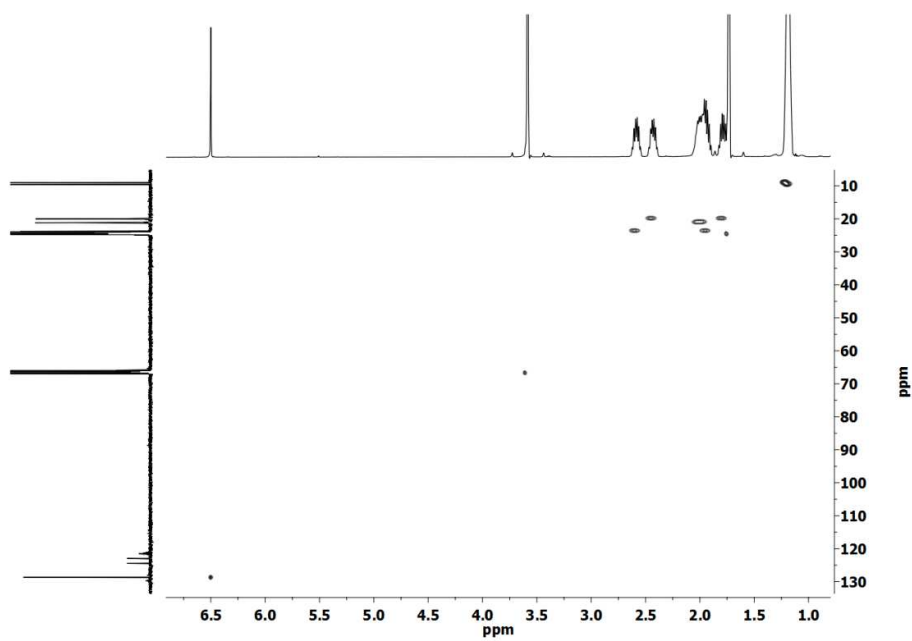

Figure S4. C,H Correlation NMR of **1** in THF- $\text{d}_8$

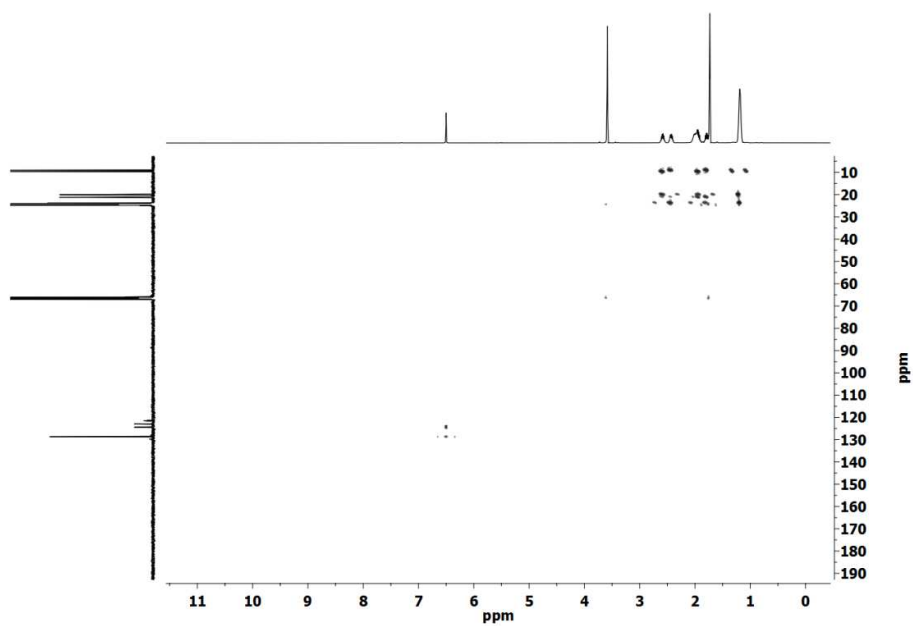

**Figure S5.** C,H Correlation (longrange) NMR of **1** in THF- $d_8$

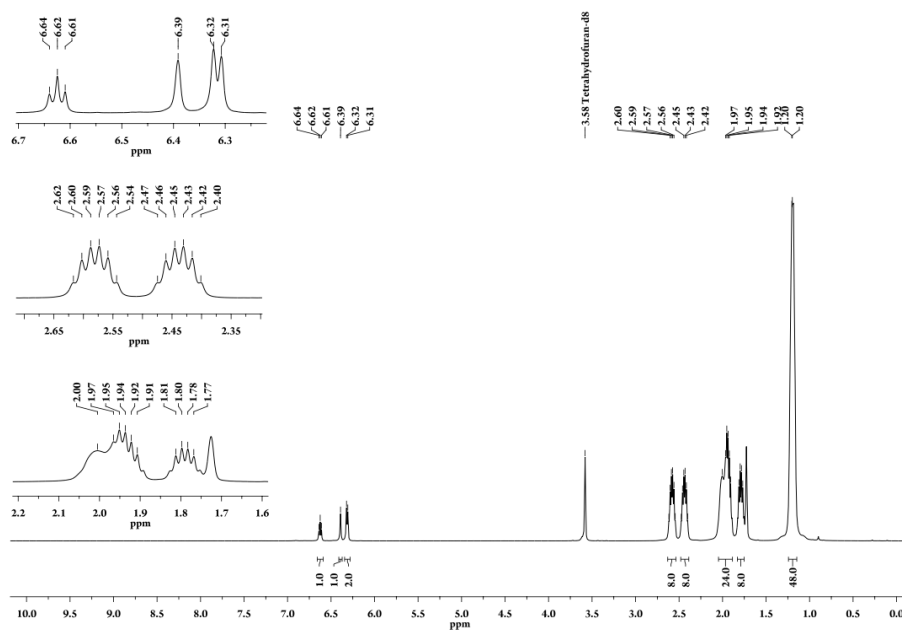

**Figure S6.**  $^1\text{H}$  NMR of **2** in THF- $d_8$

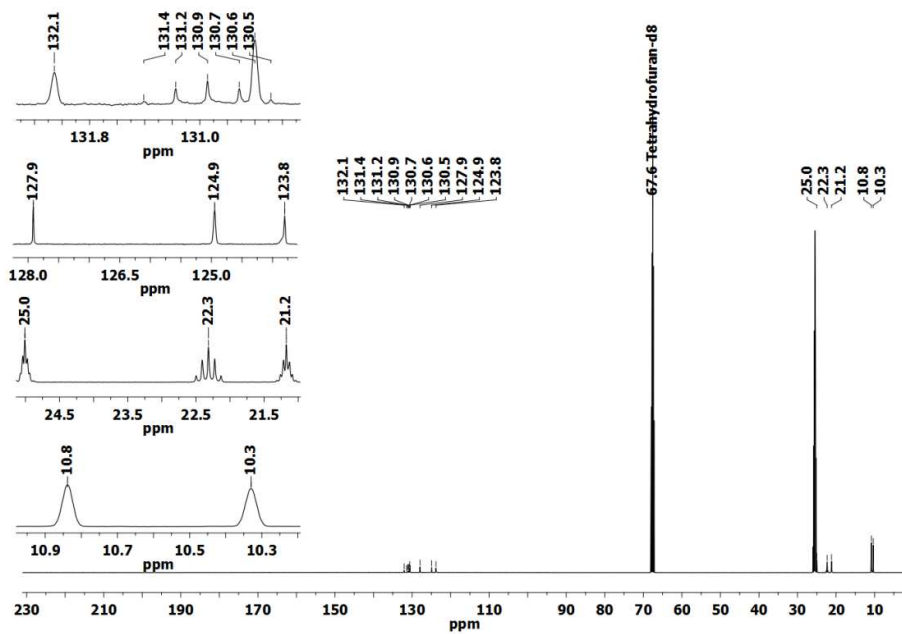

Figure S7.  $^{13}\text{C}\{^1\text{H}\}$  NMR of **2** in  $\text{THF-d}_8$

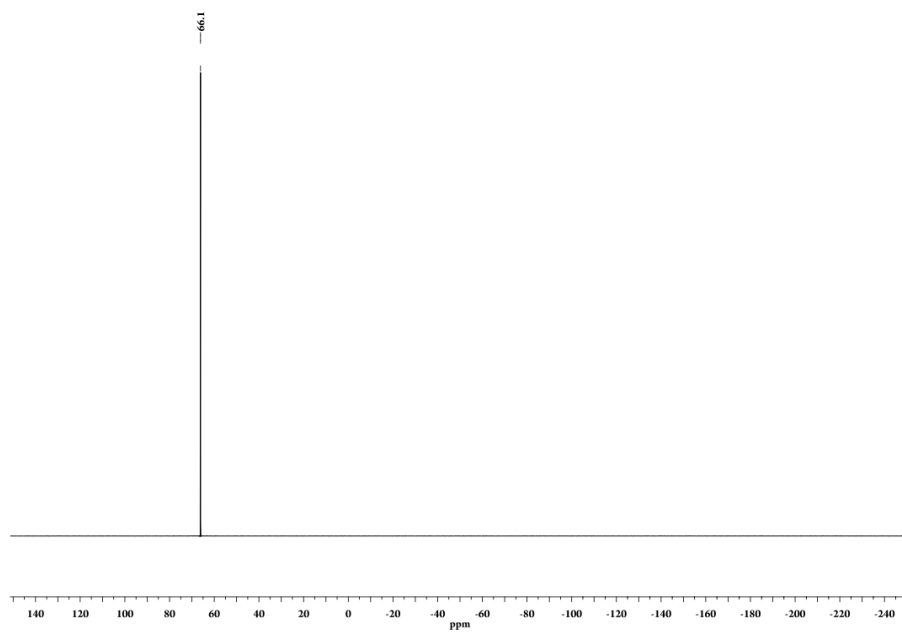

Figure S8.  $^{31}\text{P}\{^1\text{H}\}$  NMR of **2** in  $\text{THF-d}_8$

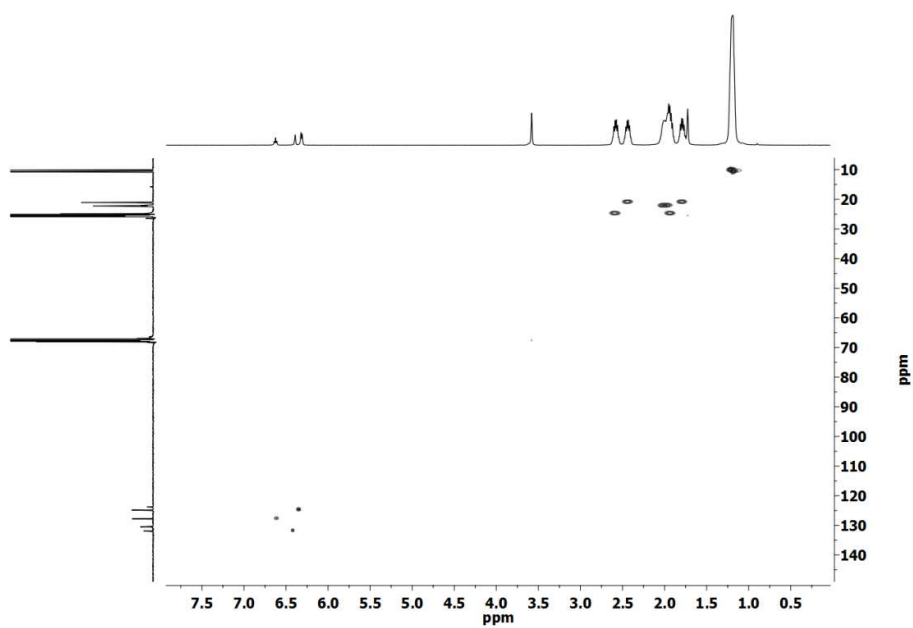

**Figure S9.** C,H Correlation NMR of **2** in THF- $d_8$

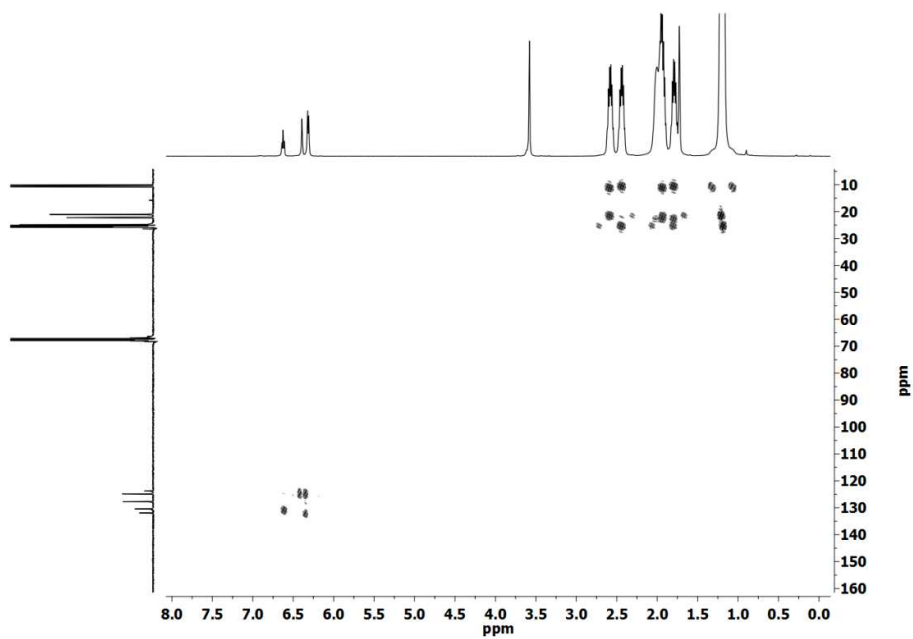

**Figure S10.** C,H Correlation (longrange) NMR of **2** in THF- $d_8$

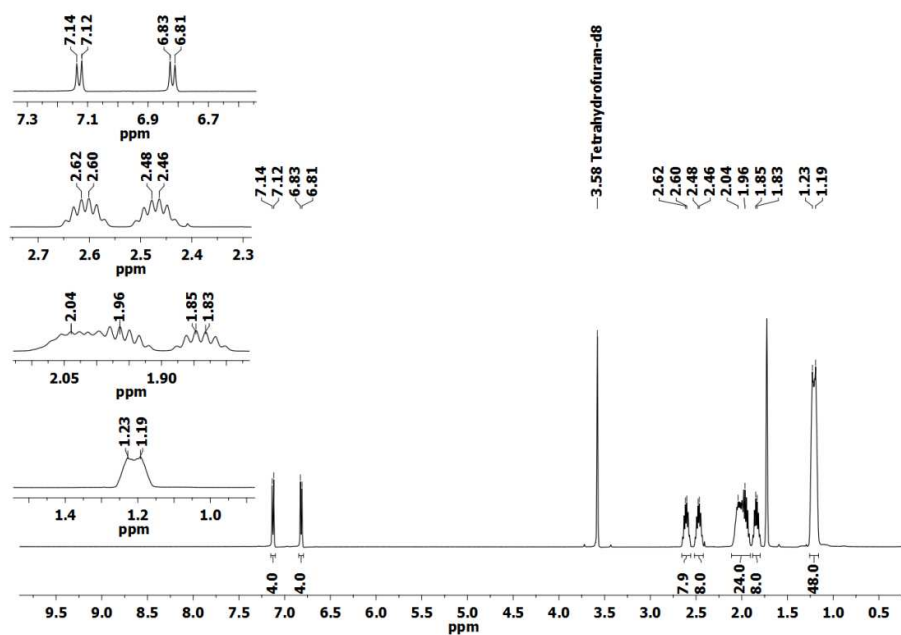

Figure S11. <sup>1</sup>H NMR of **3** in CD<sub>2</sub>Cl<sub>2</sub>

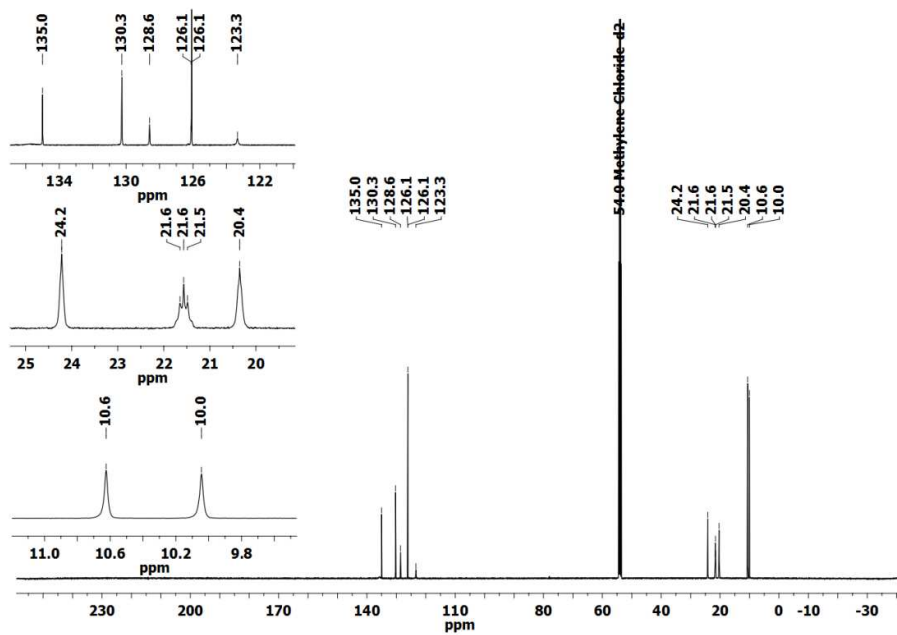

Figure S12. <sup>13</sup>C{<sup>1</sup>H} NMR of **3** in CD<sub>2</sub>Cl<sub>2</sub>

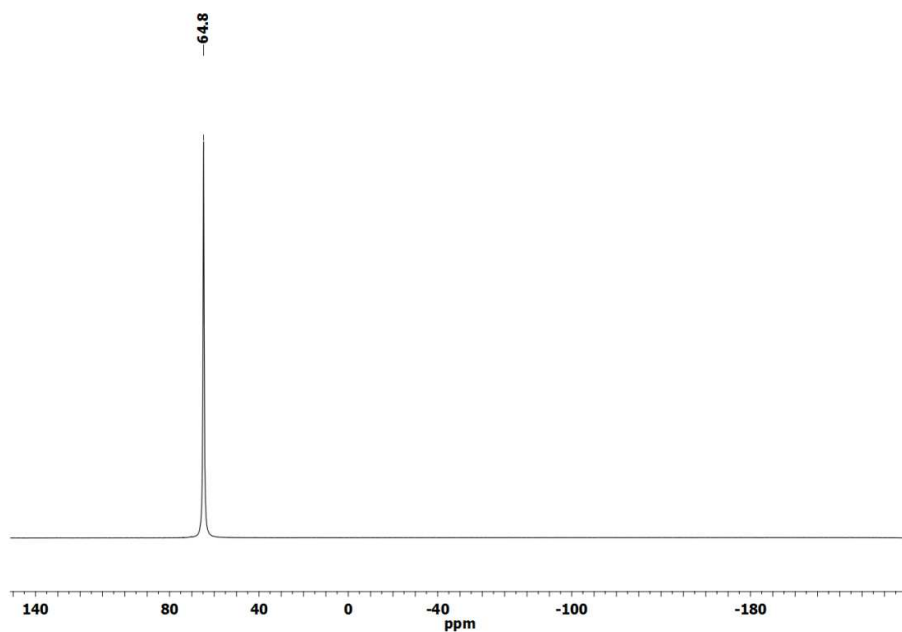

Figure S13.  $^{31}\text{P}\{^1\text{H}\}$  NMR of **3** in  $\text{CD}_2\text{Cl}_2$

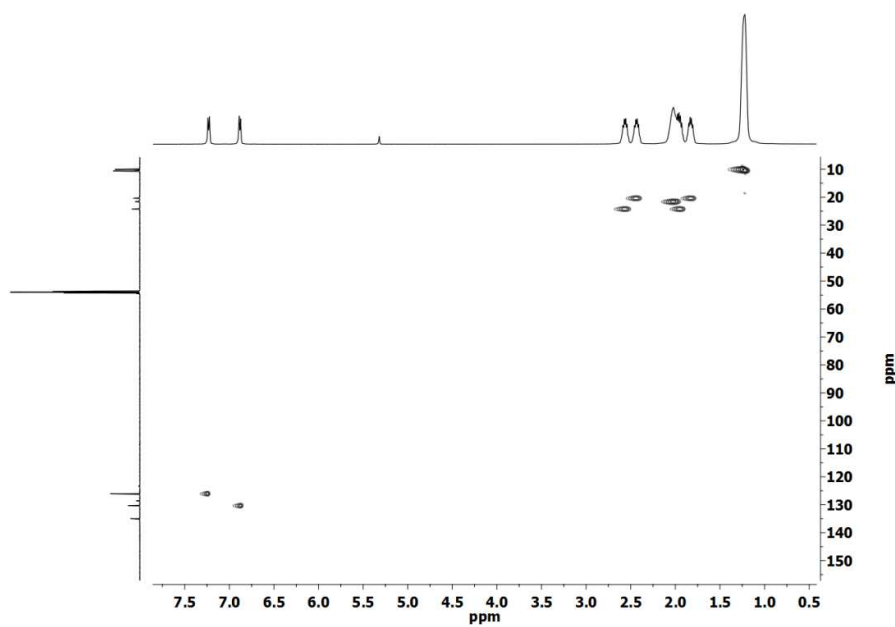

Figure S14. C,H Correlation of **3** in  $\text{CD}_2\text{Cl}_2$

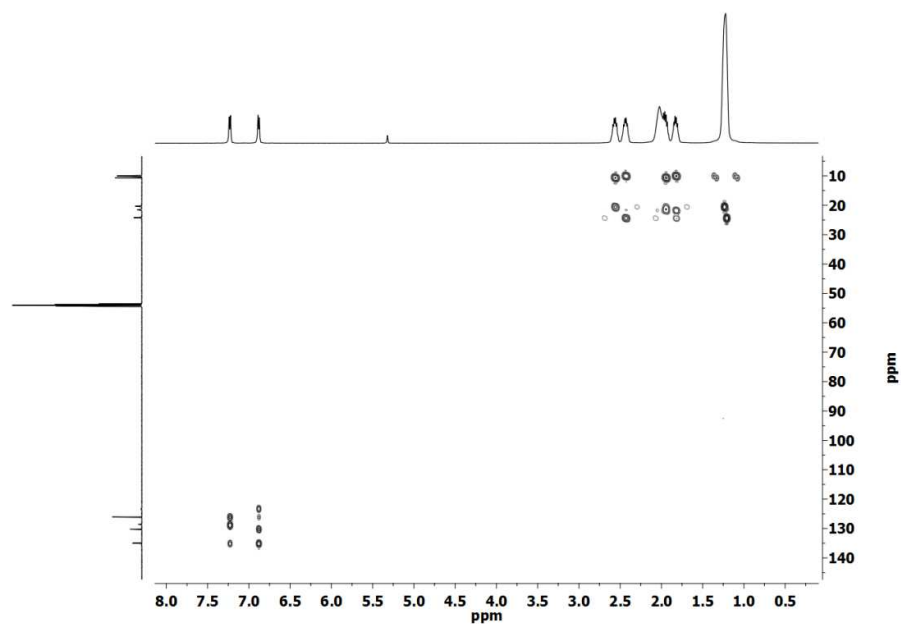

Figure S15. C,H Correlation (longrange) of **3** in  $\text{CD}_2\text{Cl}_2$

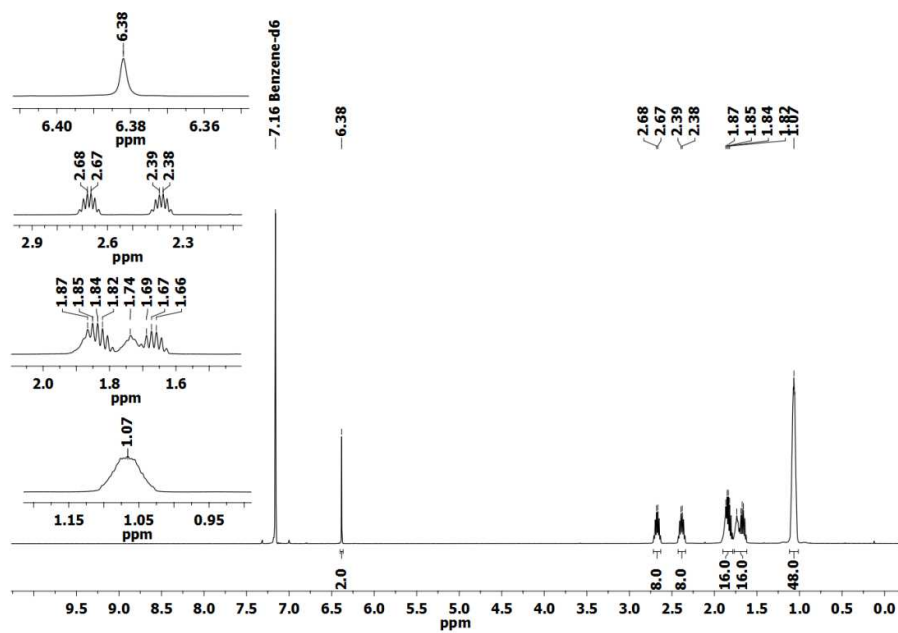

Figure S16.  $^1\text{H}$  NMR of **4** in  $\text{C}_6\text{D}_6$



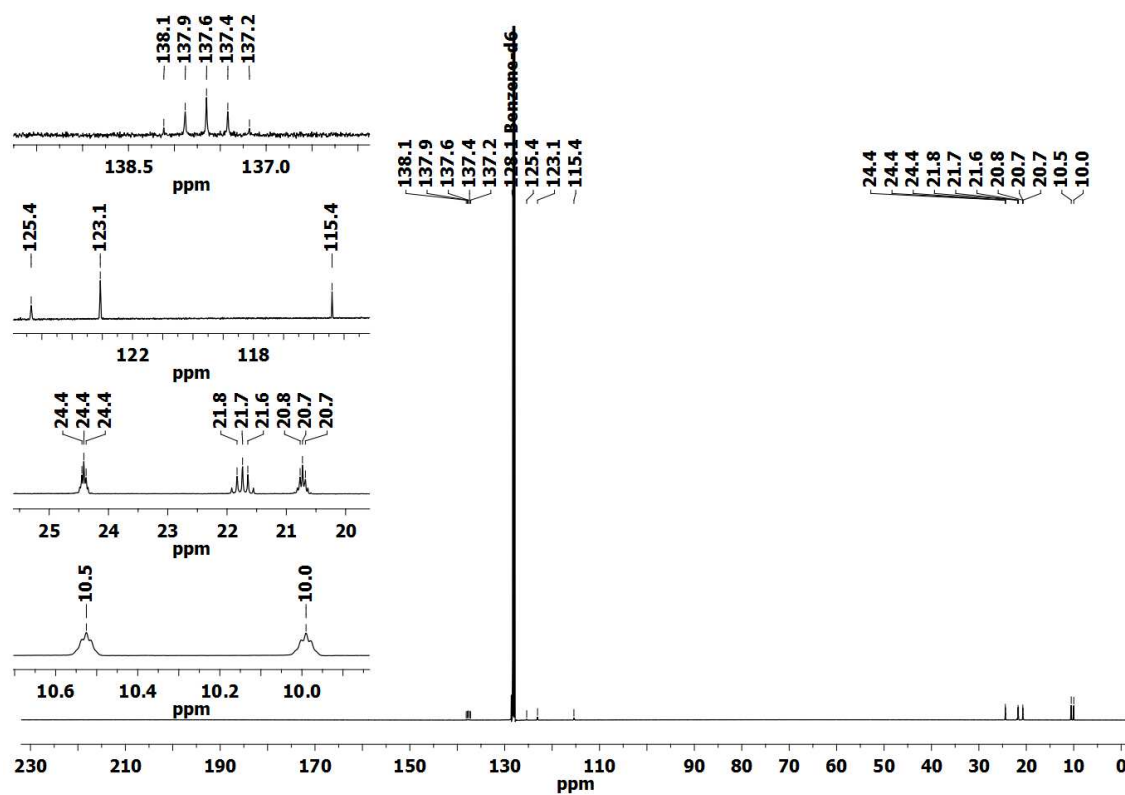

Figure S17.  $^{13}\text{C}\{^1\text{H}\}$  NMR of **4** in  $\text{C}_6\text{D}_6$

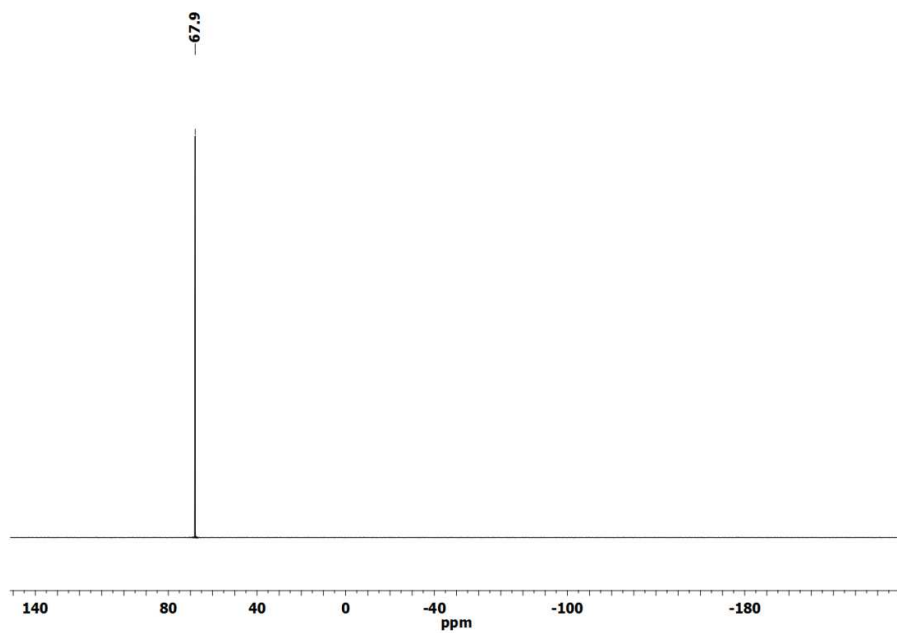

Figure S18.  $^{31}\text{P}\{^1\text{H}\}$  NMR of **4** in  $\text{C}_6\text{D}_6$

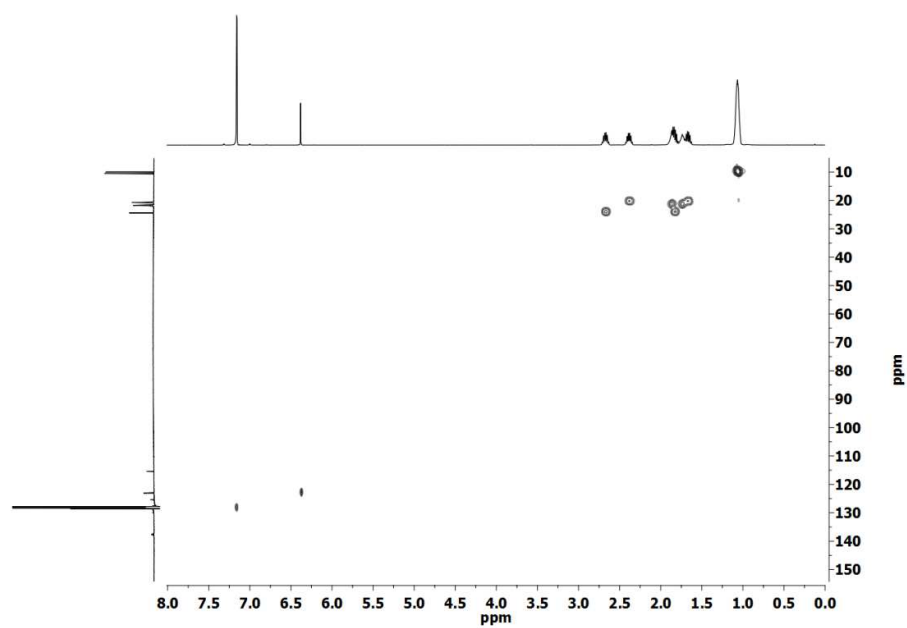

*Figure S19.* C,H-Correlation of **4** in C<sub>6</sub>D<sub>6</sub>

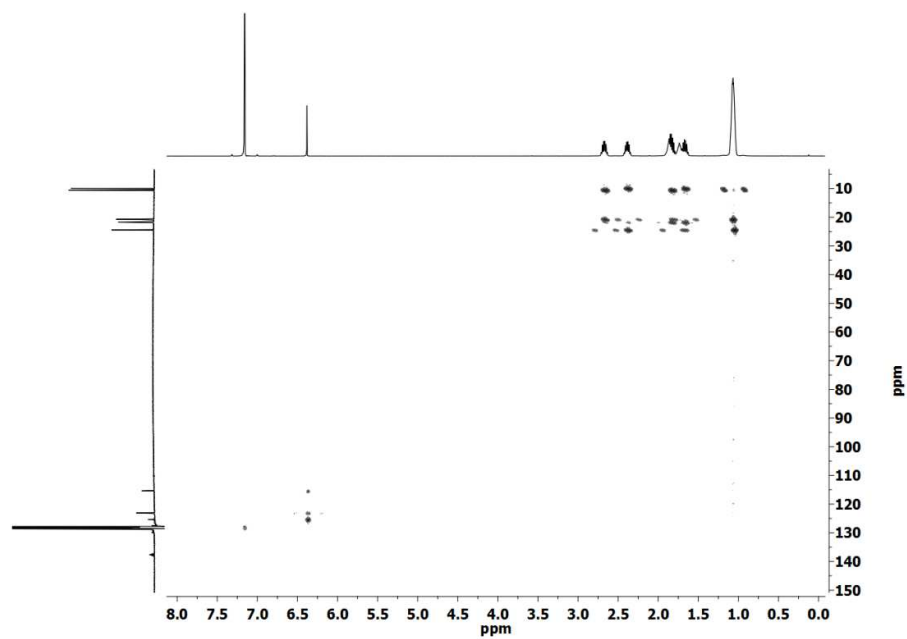

*Figure S20.* C,H-Correlation (longrange) of **4** in C<sub>6</sub>D<sub>6</sub>

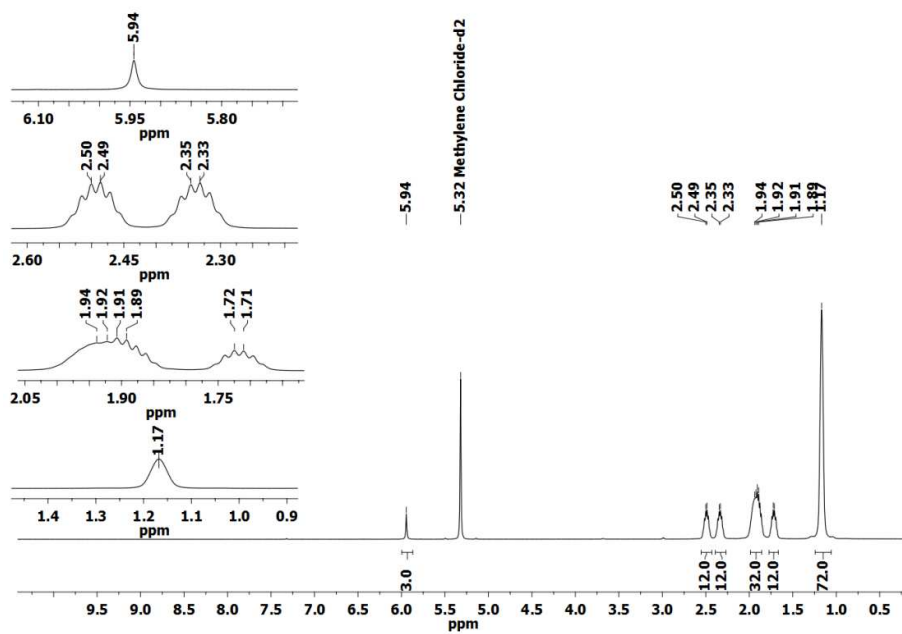

Figure S21. <sup>1</sup>H NMR of **5** in CD<sub>2</sub>Cl<sub>2</sub>

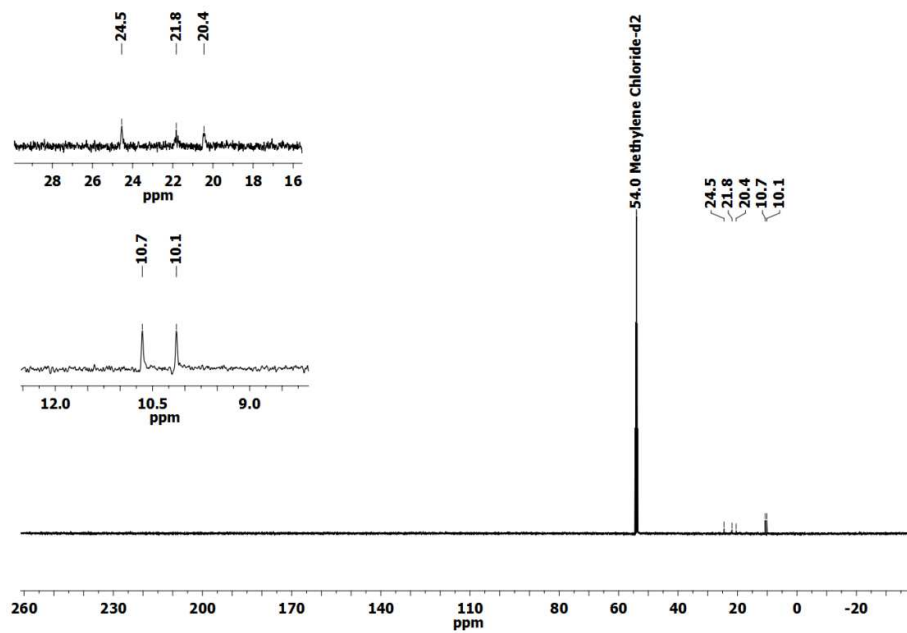

Figure S22. <sup>13</sup>C{<sup>1</sup>H} NMR of **5** in CD<sub>2</sub>Cl<sub>2</sub>

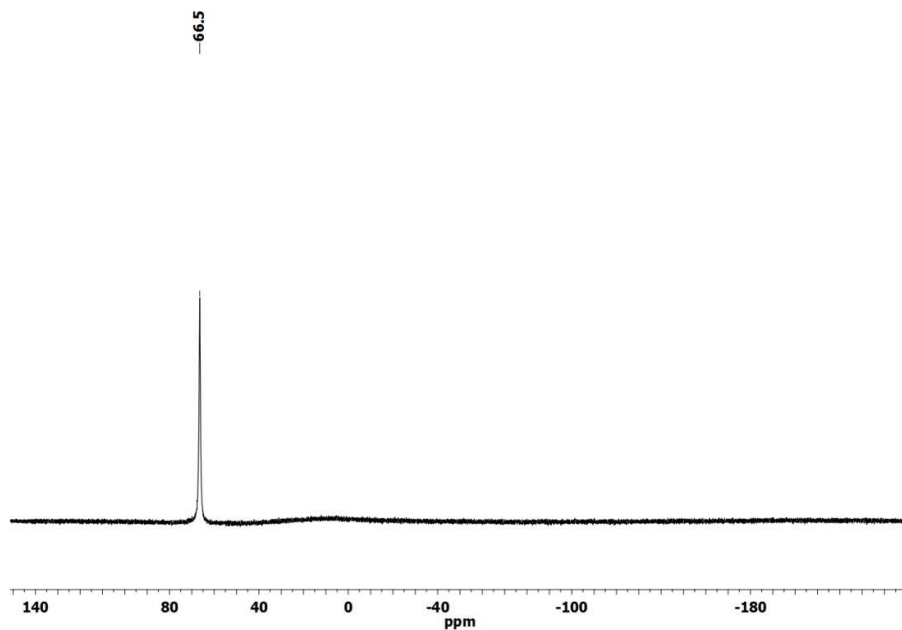

Figure S23. <sup>31</sup>P{<sup>1</sup>H} NMR of **5** in CD<sub>2</sub>Cl<sub>2</sub>

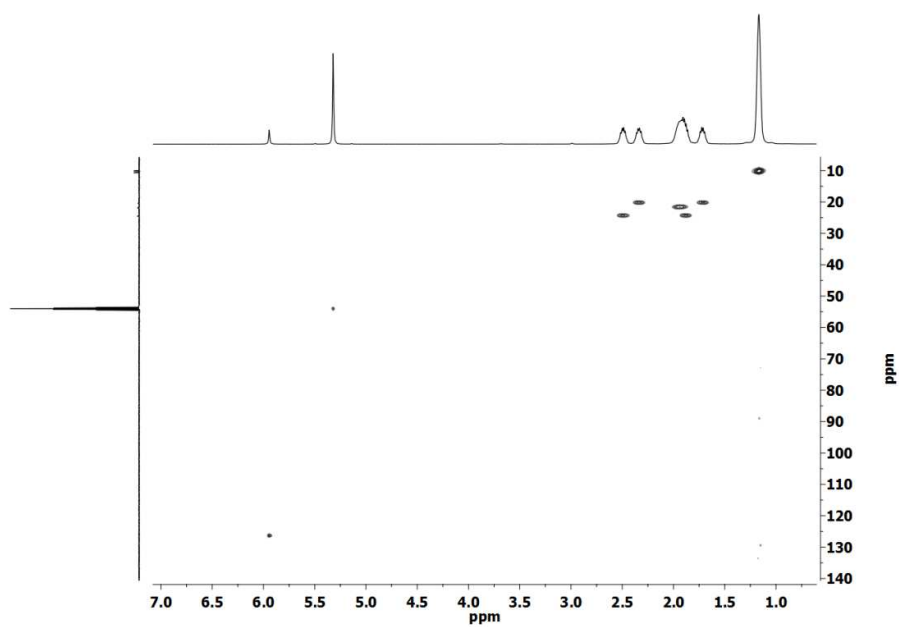

Figure S24. C,H Correlation of **5** in CD<sub>2</sub>Cl<sub>2</sub>

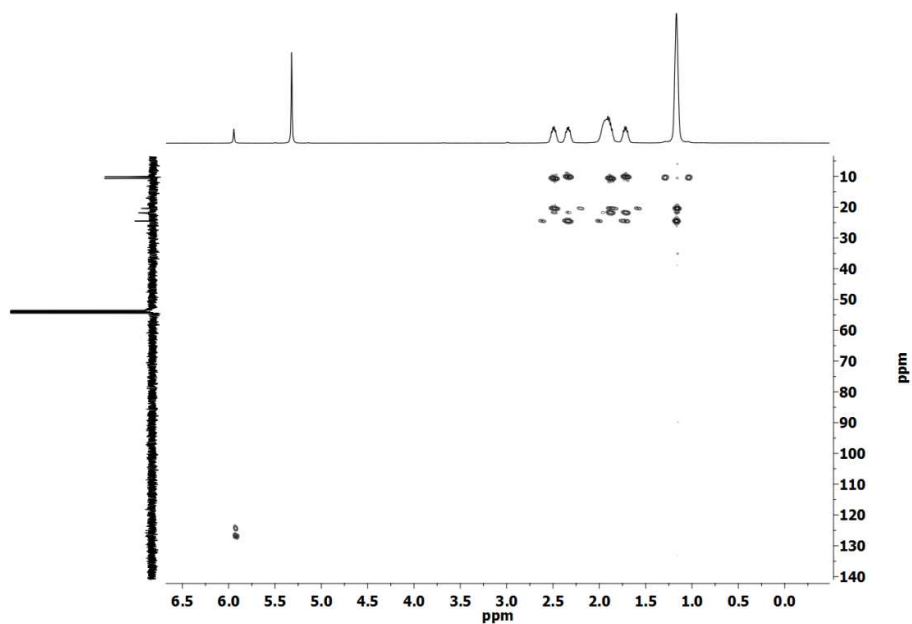

Figure S25. C,H Correlation (longrange) of **5** in  $\text{CD}_2\text{Cl}_2$

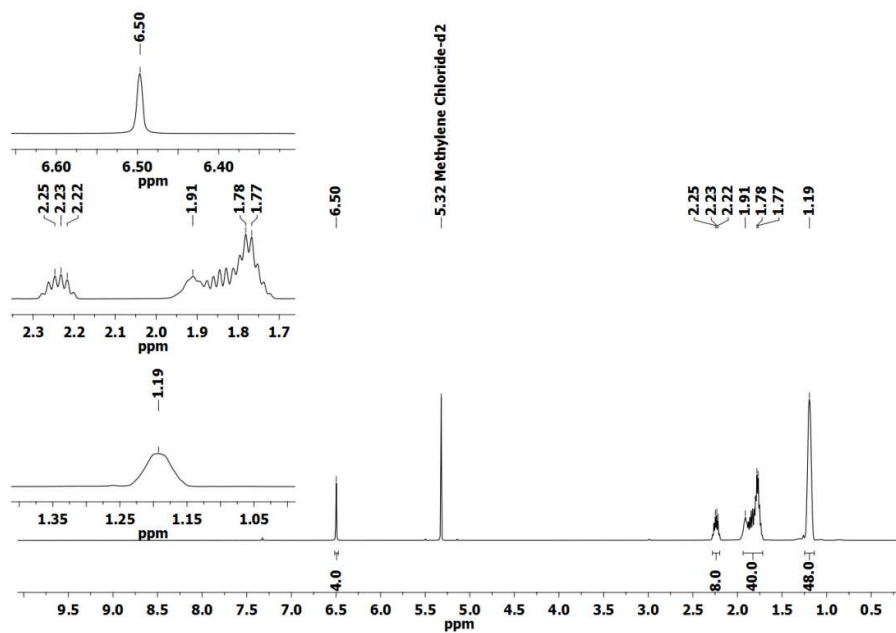

Figure S26.  $^1\text{H}$  NMR of **6** in  $\text{CD}_2\text{Cl}_2$

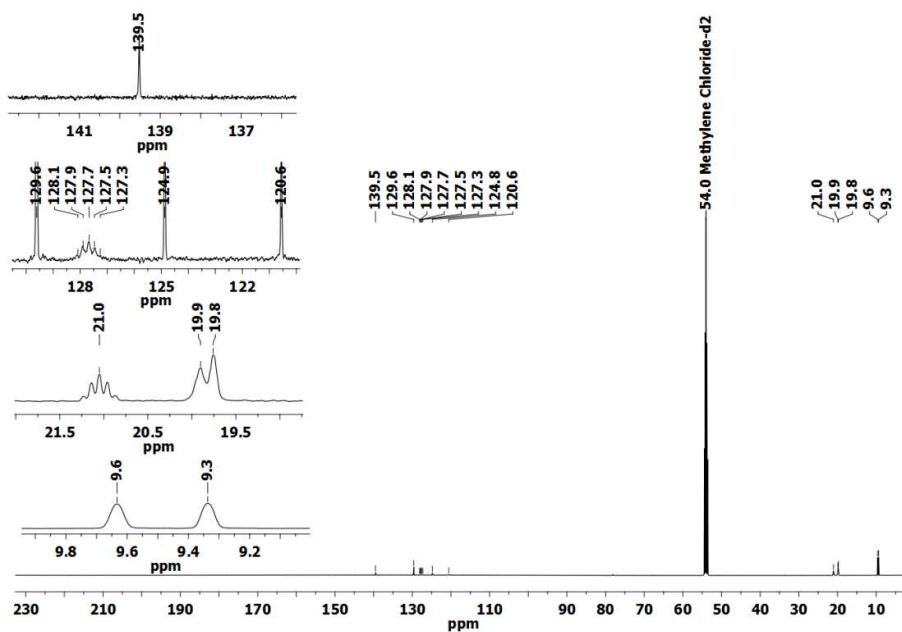

Figure S27.  $^{13}\text{C}\{^1\text{H}\}$  NMR of 6 in  $\text{CD}_2\text{Cl}_2$

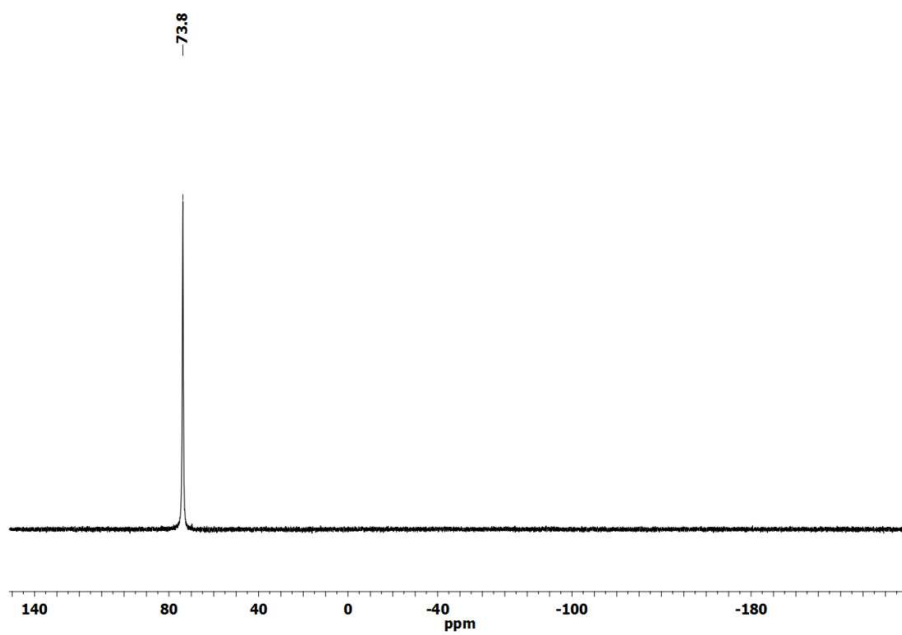

Figure S28.  $^{31}\text{P}\{^1\text{H}\}$  NMR of 6 in  $\text{CD}_2\text{Cl}_2$

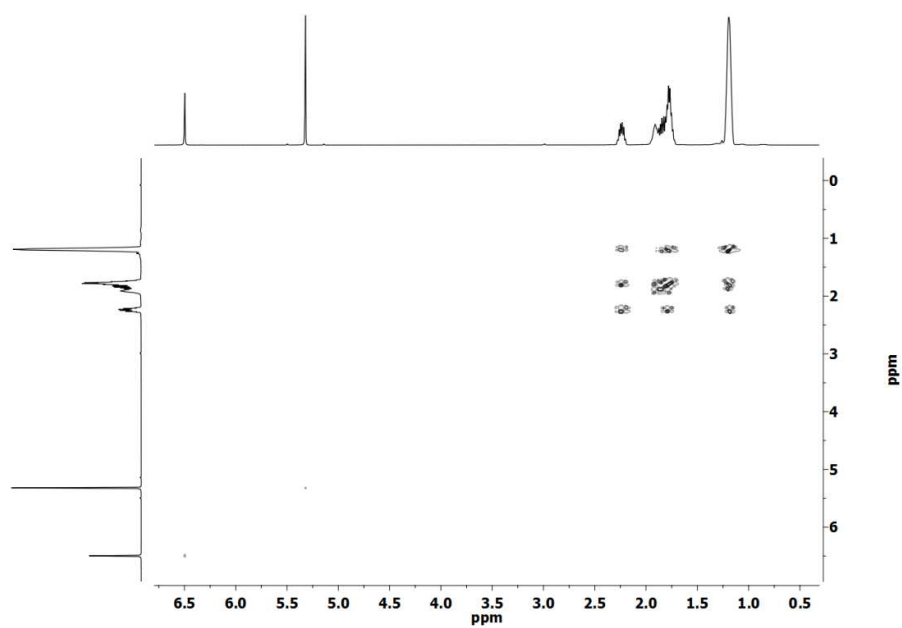

*Figure S29.* H,H Correlation (COSY) of **6** in CD<sub>2</sub>Cl<sub>2</sub>

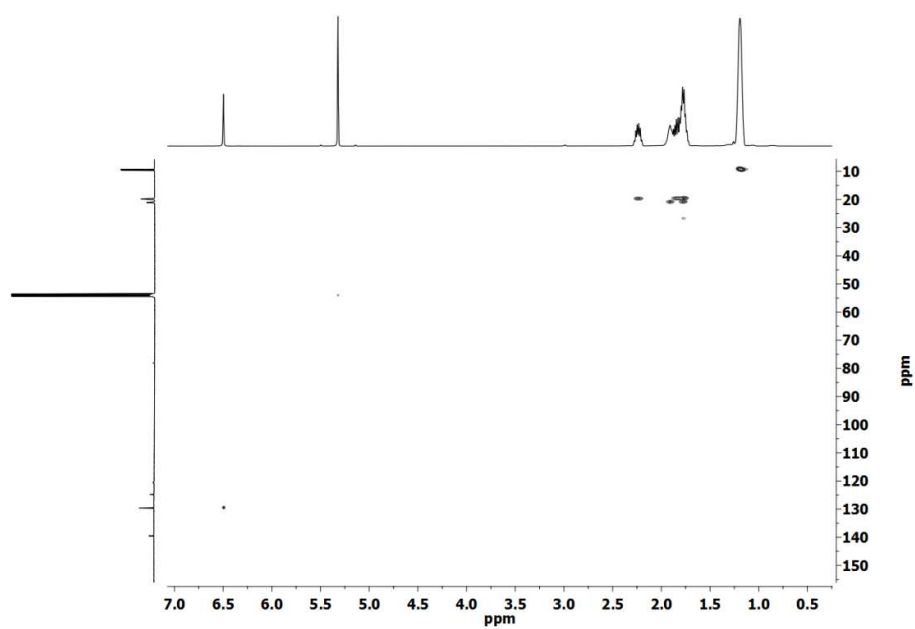

*Figure S30.* C,H Correlation of **6** in CD<sub>2</sub>Cl<sub>2</sub>

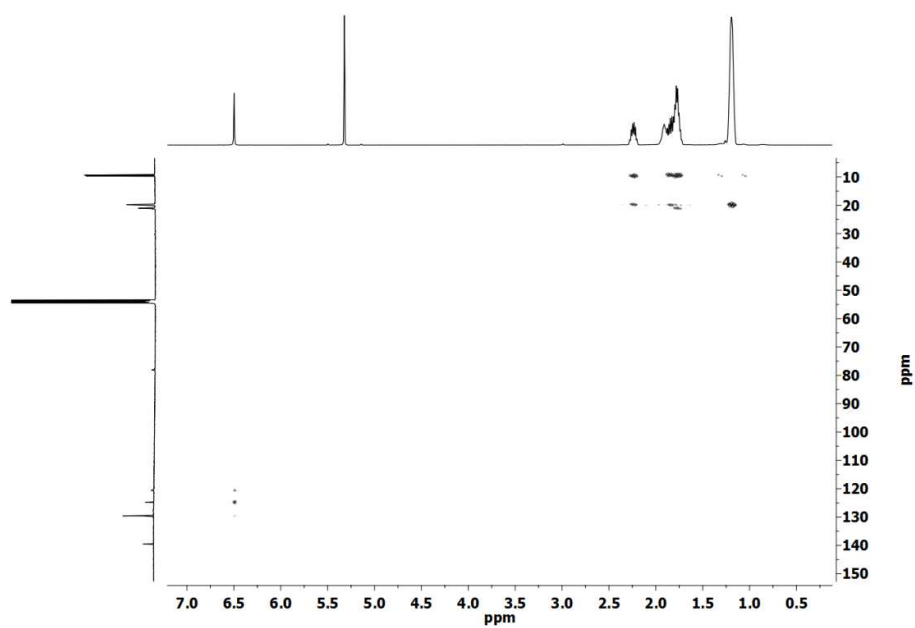

Figure S31. C,H Correlation (longrange) of 6 in  $\text{CD}_2\text{Cl}_2$

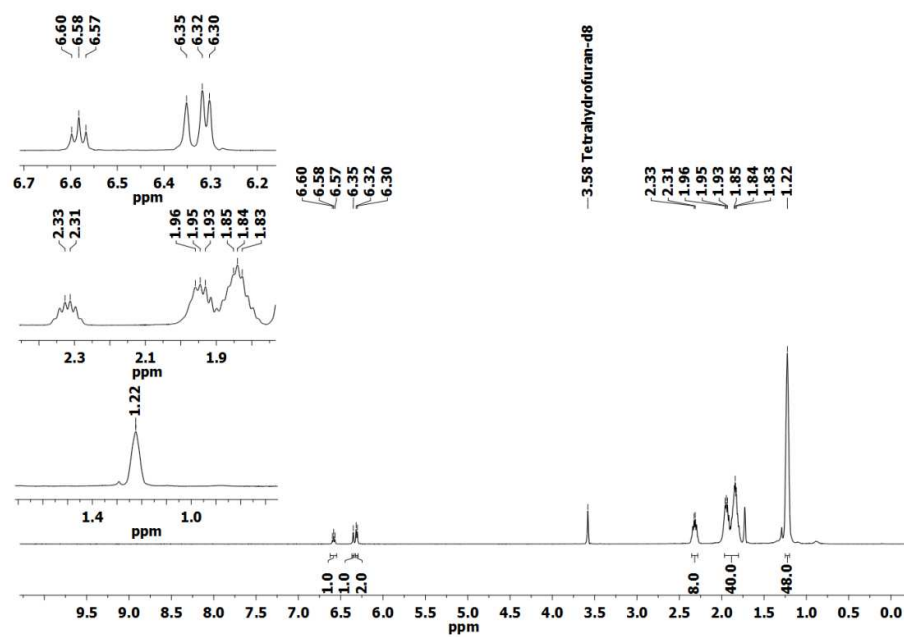

Figure S32.  $^1\text{H}$  NMR of 7 in  $\text{THF-d}_8$



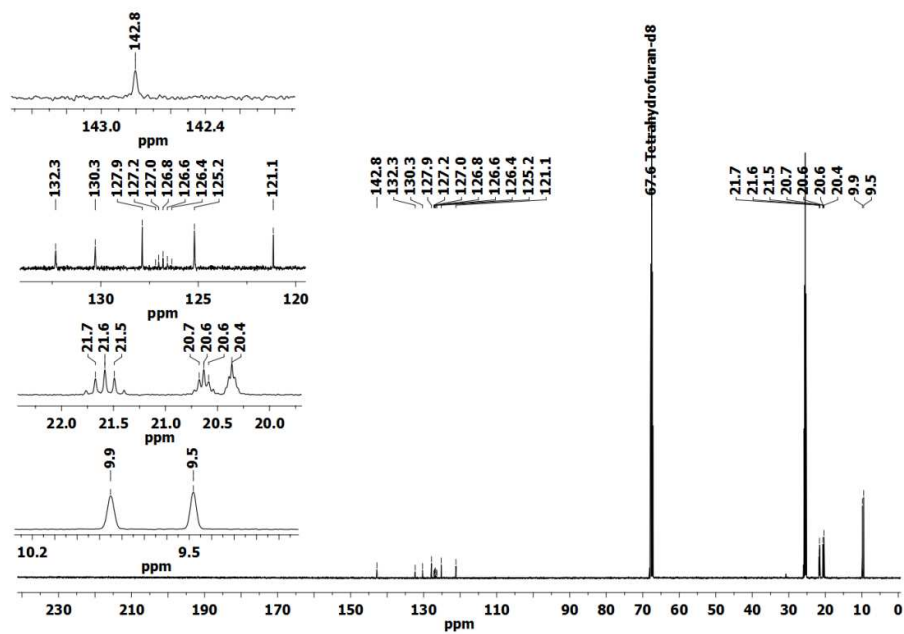

Figure S33.  $^{13}\text{C}\{^1\text{H}\}$  NMR of **7** in  $\text{THF-d}_8$

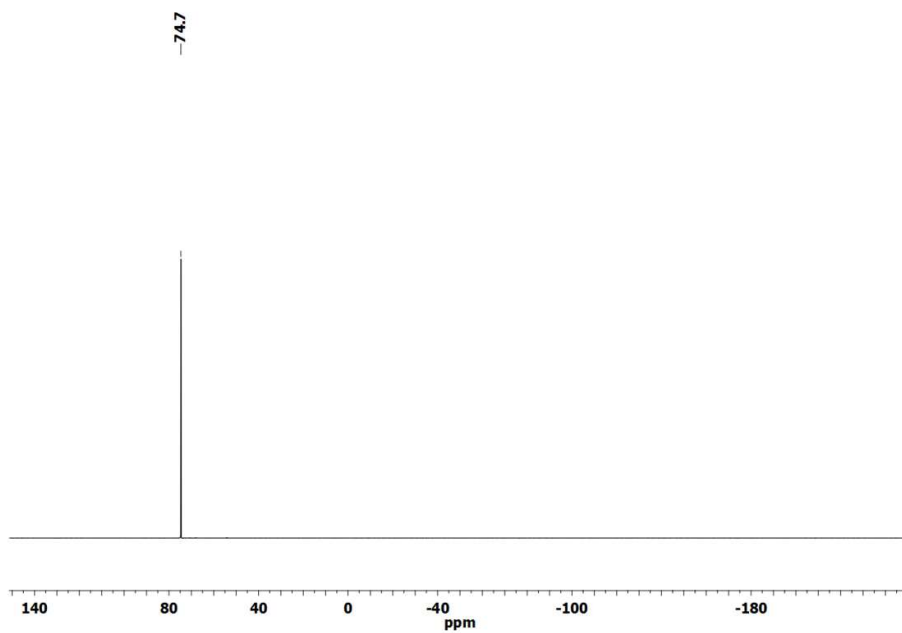

Figure S34.  $^{31}\text{P}\{^1\text{H}\}$  NMR of **7** in  $\text{THF-d}_8$

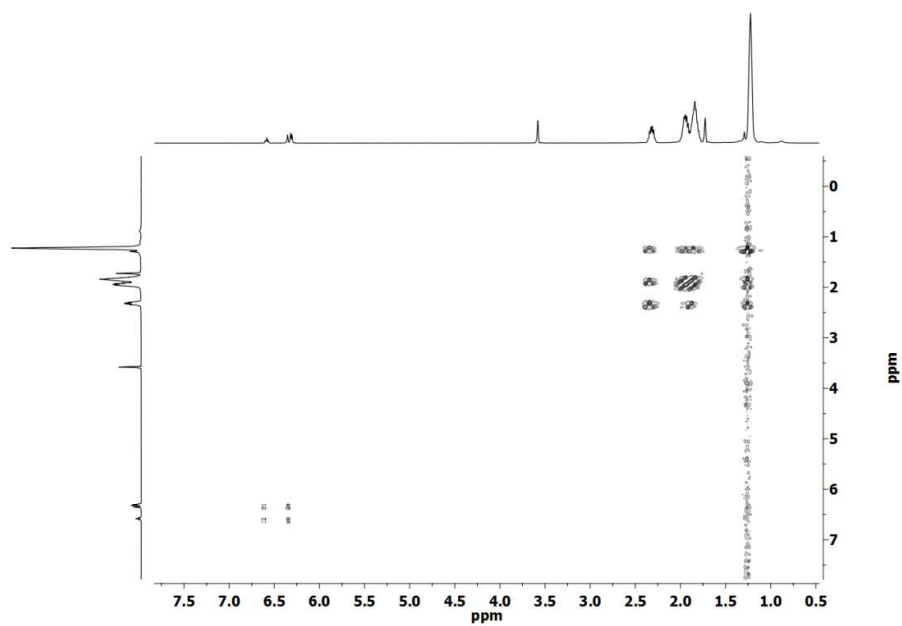

Figure S35. H,H Correlation (COSY) of **7** in THF- $d_8$

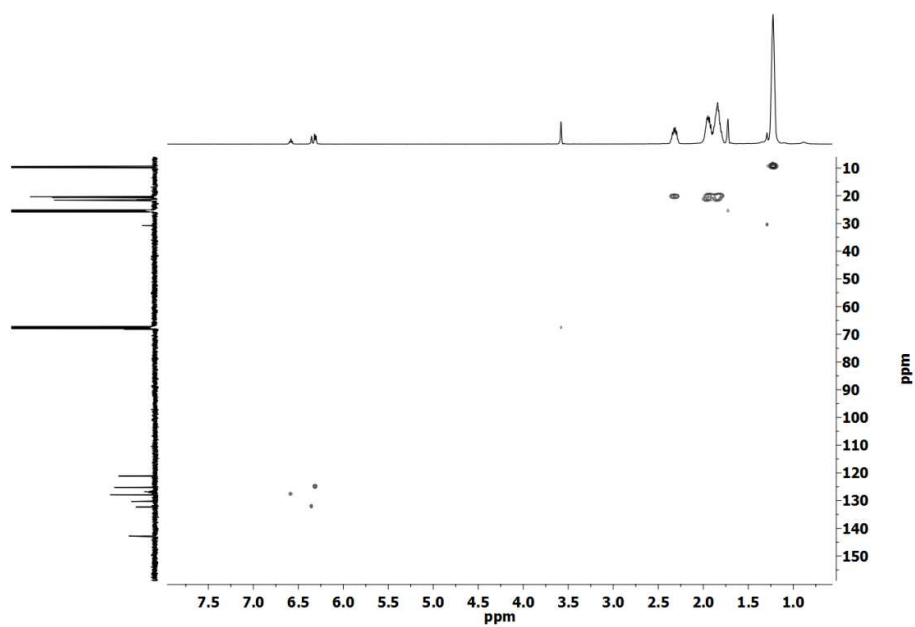

Figure S36. C, H Correlation of **7** in THF- $d_8$

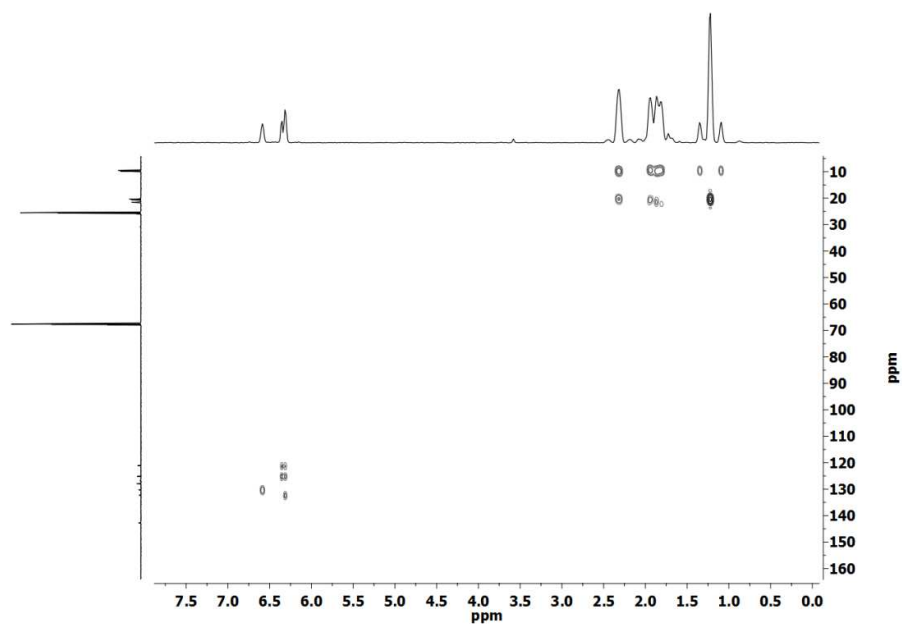

Figure S37. C, H Correlation (longrange) of **7** in THF- $d_8$

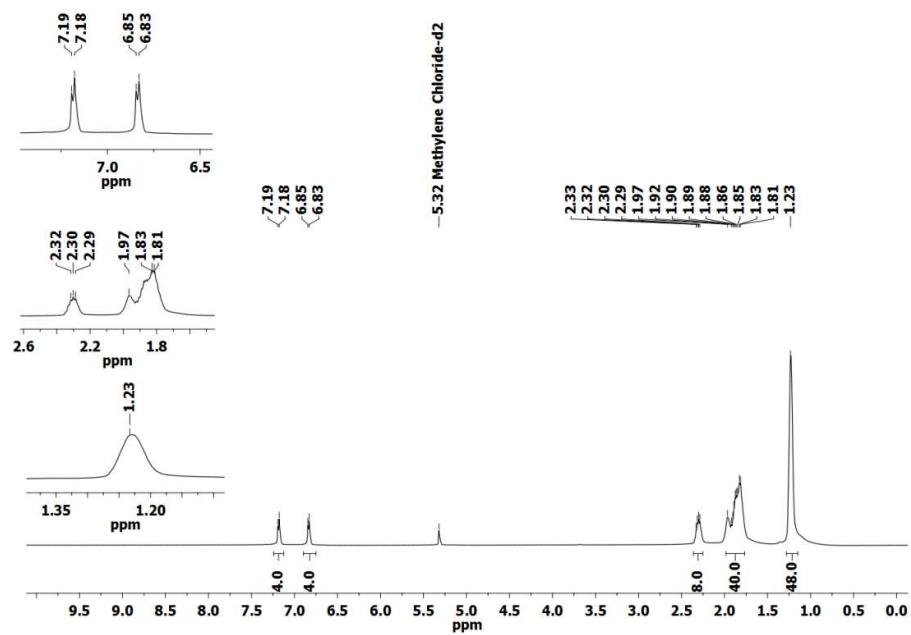

Figure S38.  $^1\text{H}$  NMR of **8** in  $\text{CD}_2\text{Cl}_2$

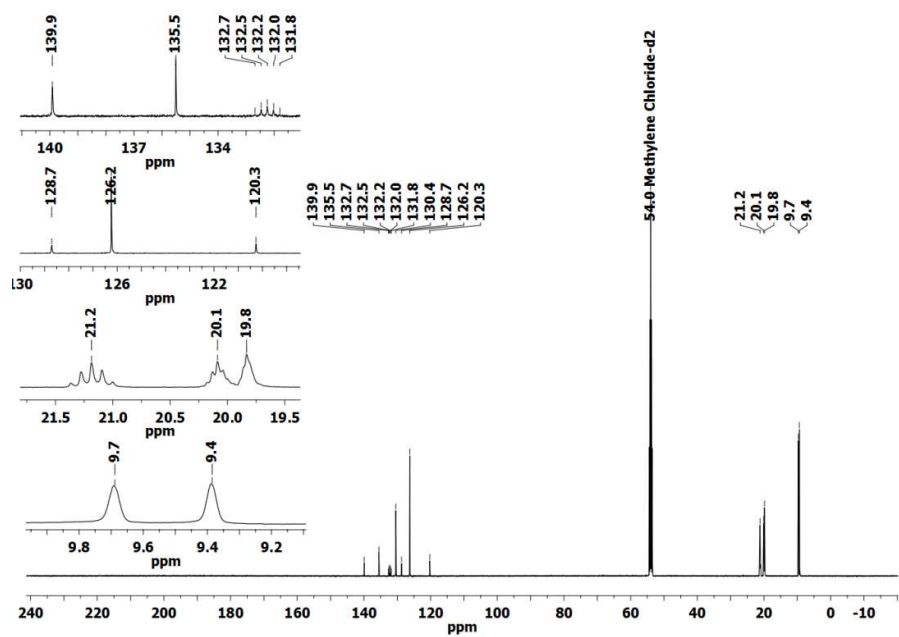

Figure S39.  $^{13}\text{C}\{^1\text{H}\}$  NMR of **8** in CD<sub>2</sub>Cl<sub>2</sub>

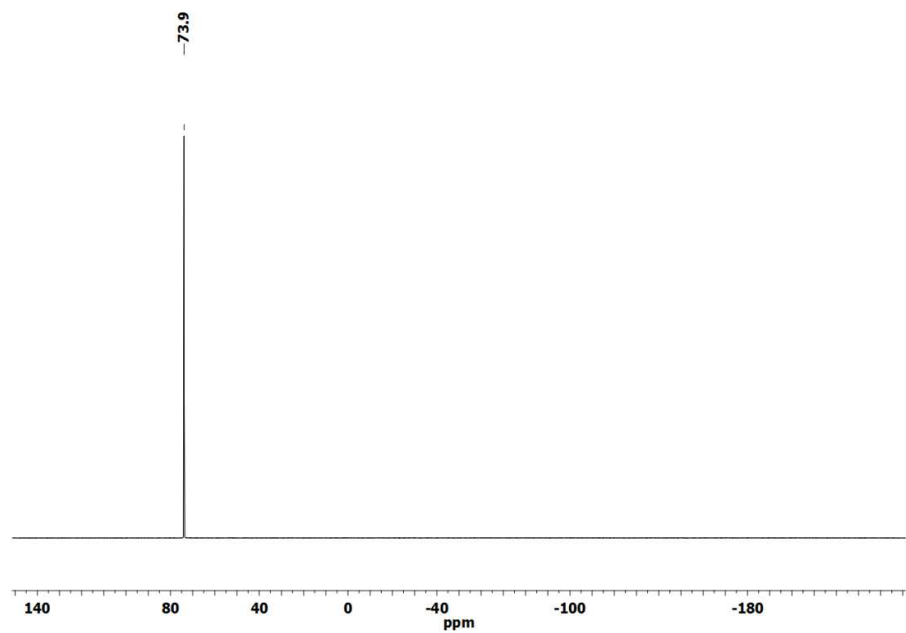

Figure S40.  $^{31}\text{P}\{^1\text{H}\}$  NMR of **8** in CD<sub>2</sub>Cl<sub>2</sub>

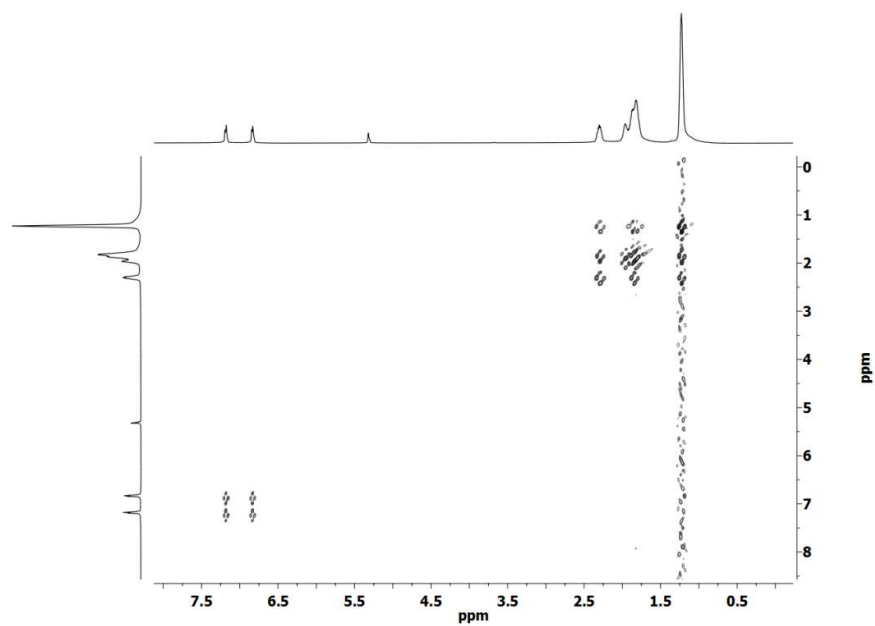

*Figure S41.* H,H Correlation (COSY) of **8** in CD<sub>2</sub>Cl<sub>2</sub>

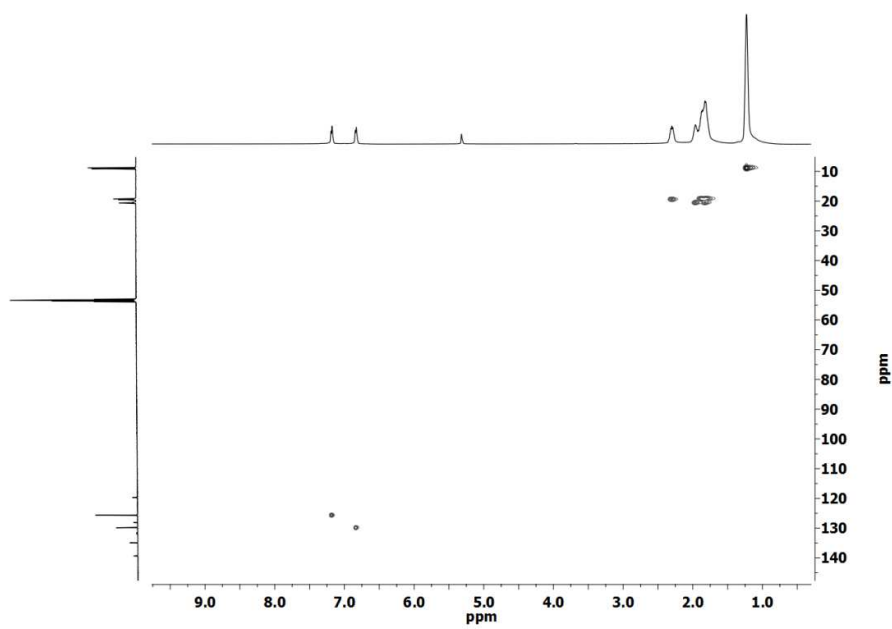

*Figure S42.* C,H Correlation of **8** in CD<sub>2</sub>Cl<sub>2</sub>

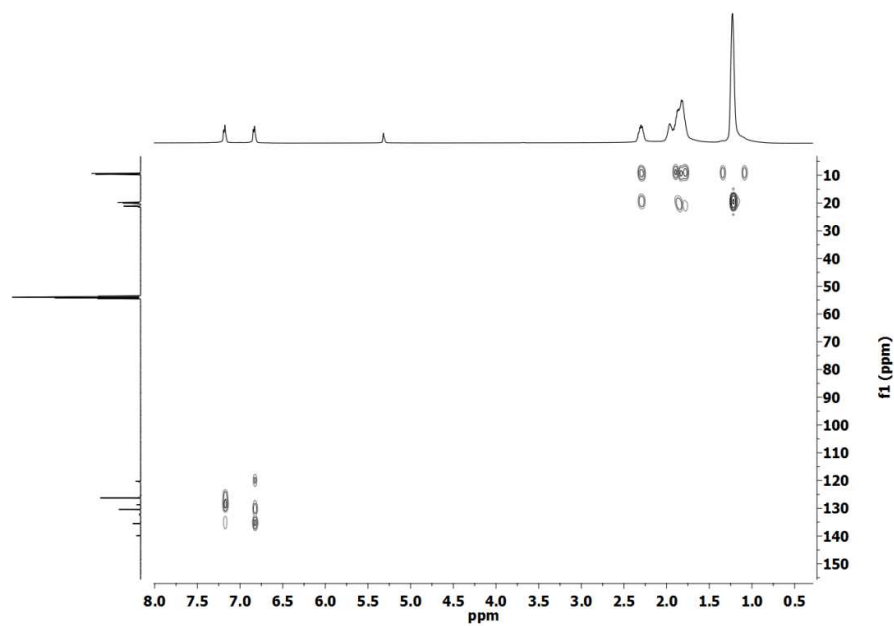

Figure S43. C,H Correlation (longrange) of **8** in  $\text{CD}_2\text{Cl}_2$

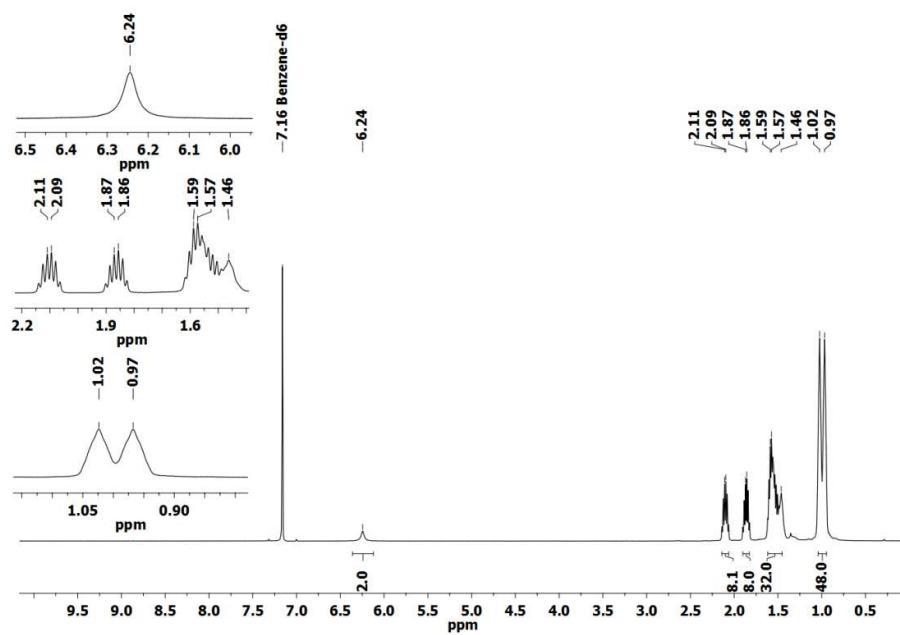

Figure S44.  $^1\text{H}$  NMR of **9** in  $\text{C}_6\text{D}_6$

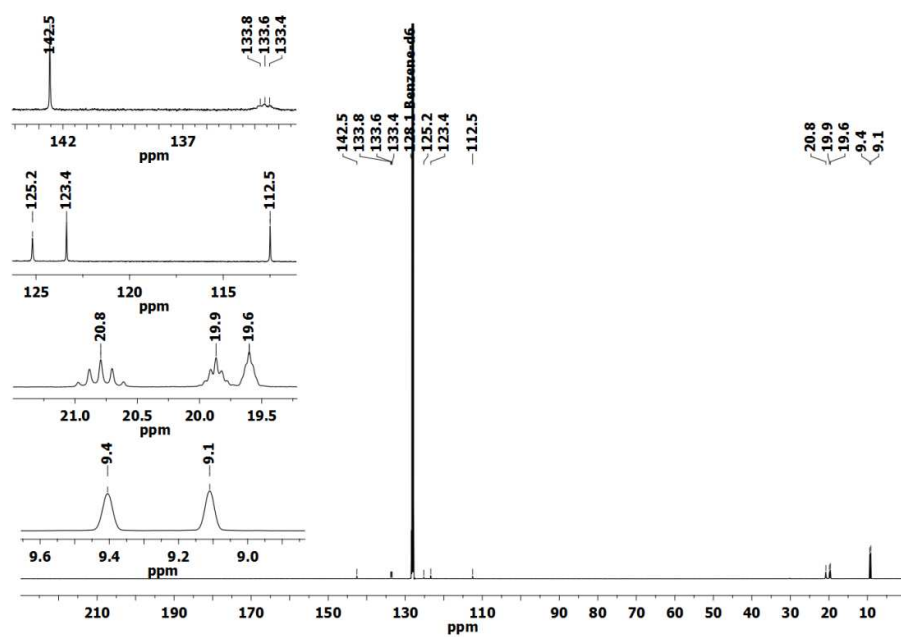

Figure S45. <sup>13</sup>C{<sup>1</sup>H} NMR of **9** in C<sub>6</sub>D<sub>6</sub>

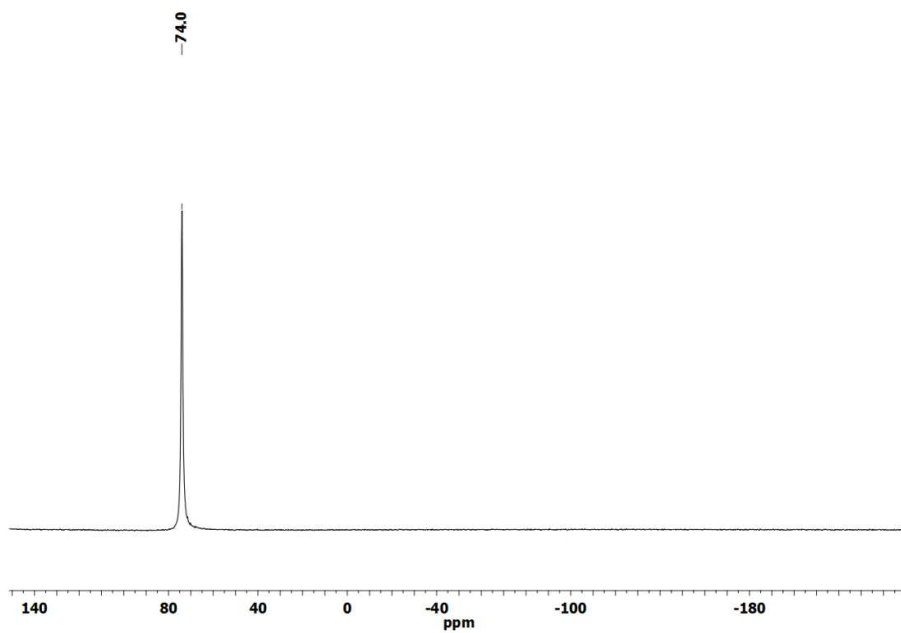

Figure S46. <sup>31</sup>P{<sup>1</sup>H} NMR of **9** in C<sub>6</sub>D<sub>6</sub>

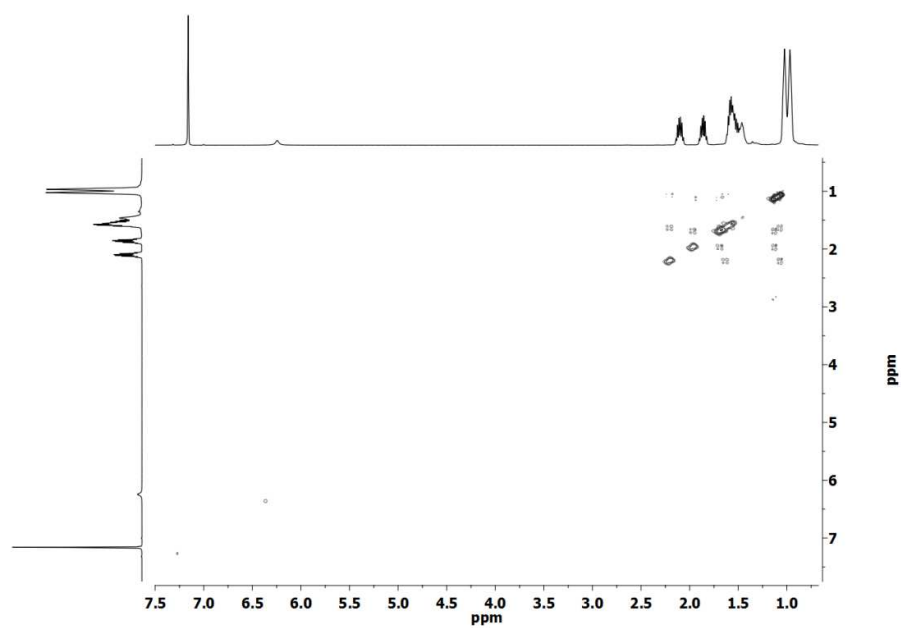

**Figure S47.** H,H Correlation (COSY) of **9** in C<sub>6</sub>D<sub>6</sub>

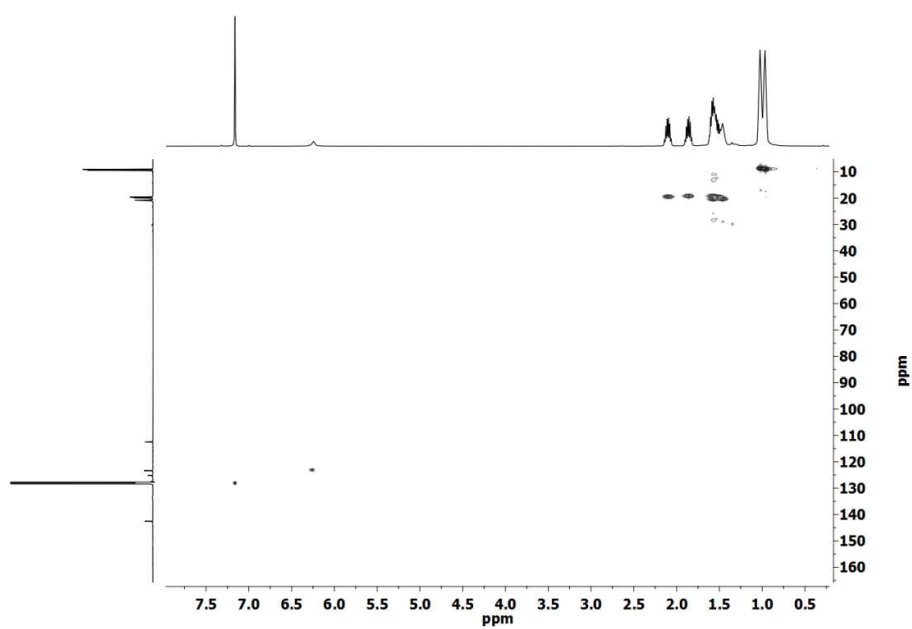

**Figure S48.** C,H Correlation of **9** in C<sub>6</sub>D<sub>6</sub>



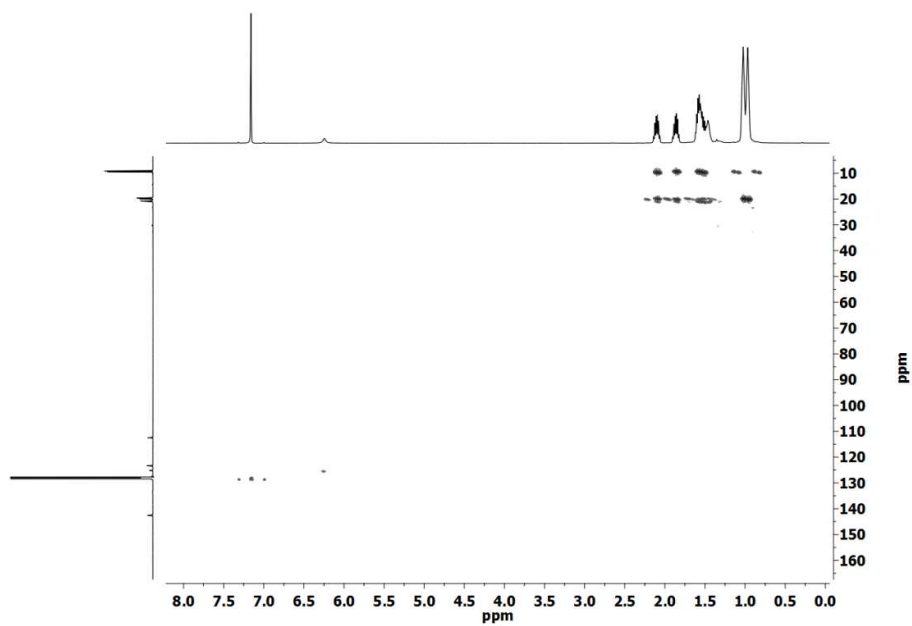

Figure S49. C,H Correlation (longrange) of **9** in  $C_6D_6$

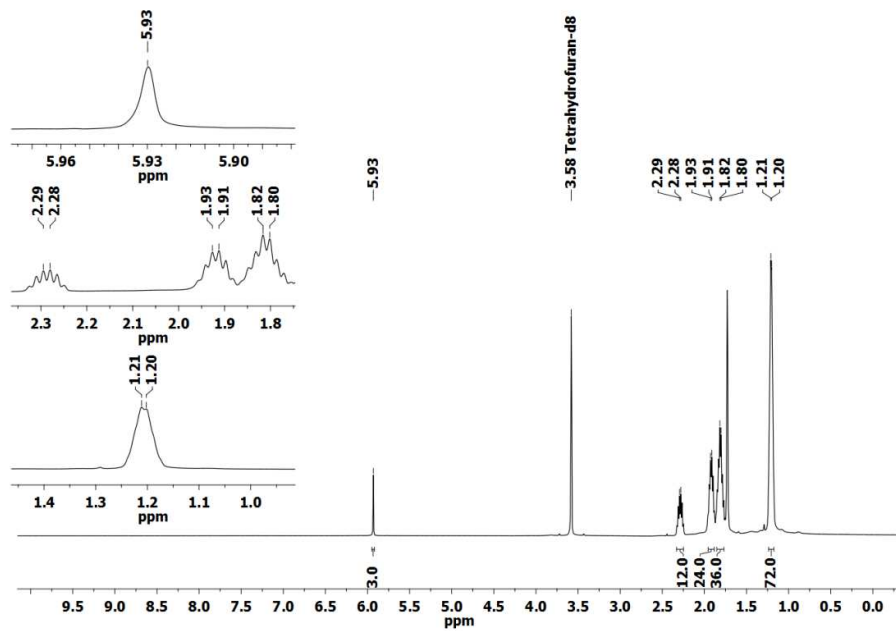

Figure S50.  $^1H$  NMR of **10** in  $THF-d_8$

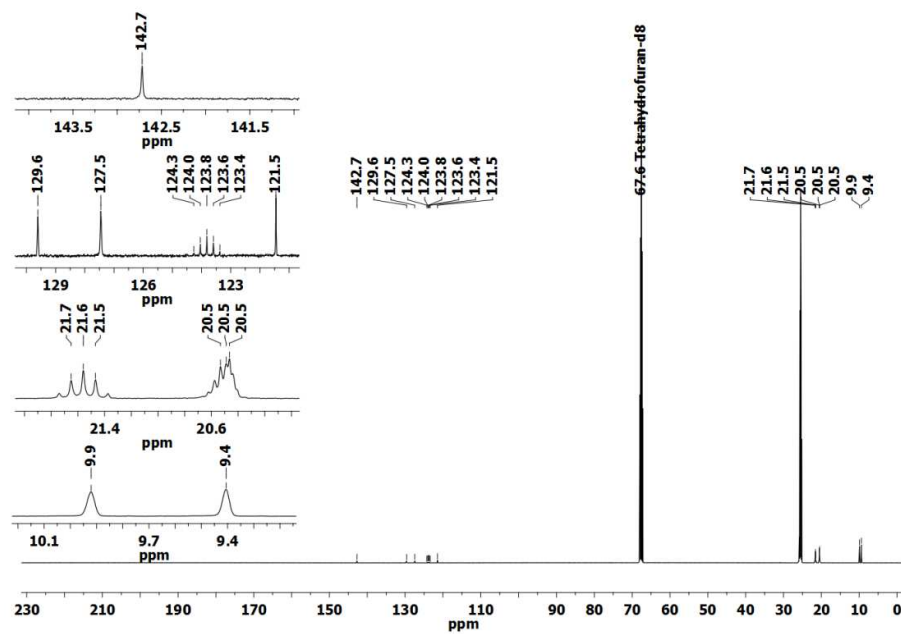

Figure S51.  $^{13}\text{C}\{^1\text{H}\}$  NMR of **10** in  $\text{THF-d}_8$

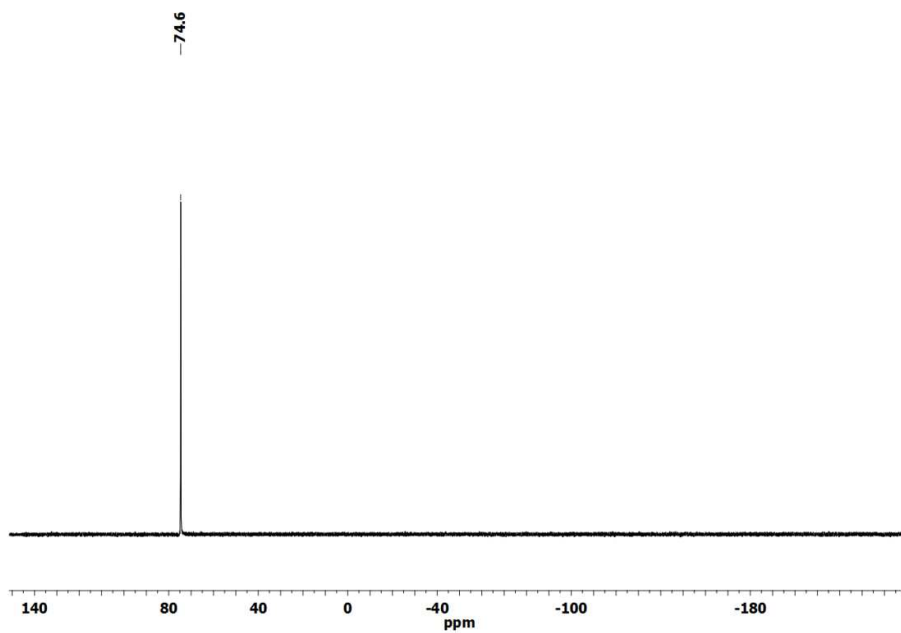

Figure S52.  $^{31}\text{P}\{^1\text{H}\}$  NMR of **10** in  $\text{THF-d}_8$

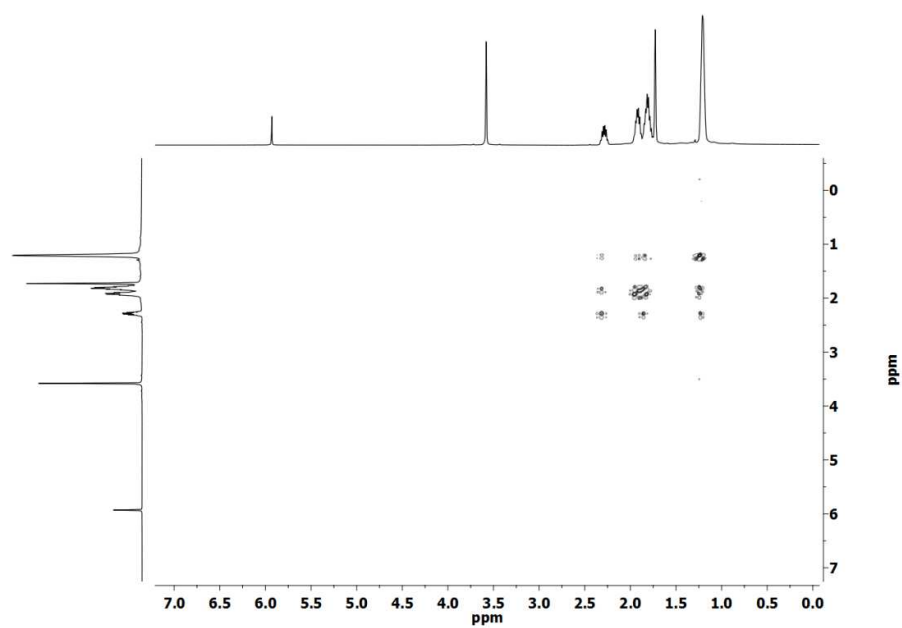

*Figure S53.* H,H Correlation (COSY) of **10** in THF- $d_8$

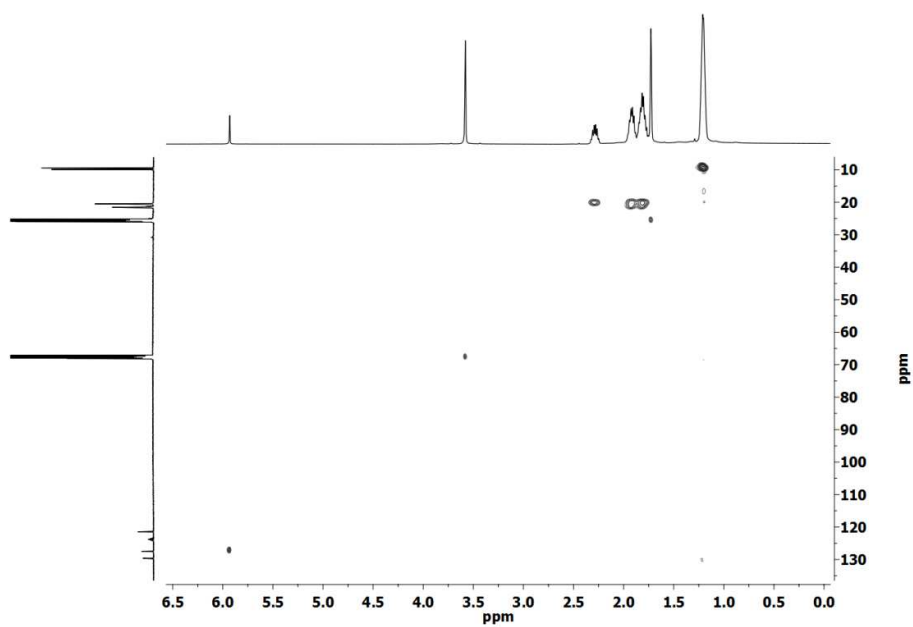

*Figure S54.* C,H Correlation of **10** in THF- $d_8$

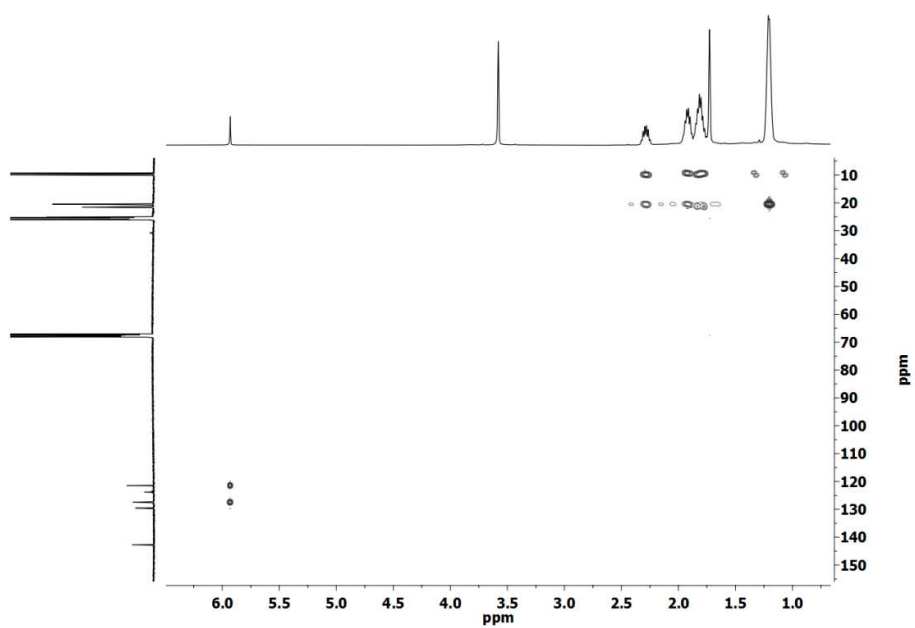

**Figure S55.** C,H Correlation (longrange) of **10** in  $\text{THF-d}_8$

## Infrared Spectra

**Table S1.** IR and Raman  $\nu$  ( $C_4$ ) bands of the bridging butadiyne unit of compounds **1** - **10**.

| No.       | IR<br>[ $\text{cm}^{-1}$ ]<br>$\nu_{\text{as}}(\text{C}\equiv\text{C})$ | IR<br>[ $\text{cm}^{-1}$ ]<br>$\nu_{\text{as}}(\text{C}=\text{C})$ | Raman [ $\text{cm}^{-1}$ ]<br>$\nu_s(\text{C}\equiv\text{C})$ | Raman [ $\text{cm}^{-1}$ ]<br>$\nu_s(\text{C}=\text{C})$ | $\nu(\text{C}\equiv\text{N})$<br>[ $\text{cm}^{-1}$ ] |
|-----------|-------------------------------------------------------------------------|--------------------------------------------------------------------|---------------------------------------------------------------|----------------------------------------------------------|-------------------------------------------------------|
| <b>1</b>  | 2028 (vs)                                                               | 1489 (m)                                                           | 2030 (m)                                                      | 1586 (s)                                                 | ---                                                   |
| <b>2</b>  | 2036 (vs)                                                               | 1571 (s), 1551 (m)                                                 | 2040 (s)                                                      | 1574 (m)                                                 | ---                                                   |
| <b>3</b>  | 2023 (vs)                                                               | 1595 (m), 1480 (s)                                                 | 2040 (w)                                                      | 1591 (vs)                                                | ---                                                   |
| <b>4</b>  | 2034 (s)                                                                | 1502 (w)                                                           | 2032 (m)                                                      | 1439 (vs)                                                | ---                                                   |
| <b>5</b>  | 2046 (vs)                                                               | 1551 (vs)                                                          | 2049 (s)                                                      | 1561 (m)                                                 | ---                                                   |
| <b>6</b>  | 2044 (s)                                                                | 1489 (m)                                                           | 2043 (m)                                                      | 1590 (s)                                                 | 2092 ( $\nu_{\text{as}}$ , s)                         |
| <b>7</b>  | 2041 (vs)                                                               | 1574 (s), 1552 (m)                                                 | 2040 (vs)                                                     | 1578 (m), 1552 (w)                                       | 2092 ( $\nu_{\text{as}}$ , s); 2097 ( $\nu_s$ , m)    |
| <b>8</b>  | 2034 (vs)                                                               | 1596 (s), 1481 (s)                                                 | 2045 (w)                                                      | 1591 (vs), 1522 (vw)                                     | 2094 ( $\nu_{\text{as}}$ , s)                         |
| <b>9</b>  | 2031 (s)                                                                | 1503 (w)                                                           | 2036 (m)                                                      | 1434 (vs)                                                | 2094 ( $\nu_{\text{as}}$ , s); 2097 ( $\nu_s$ , w)    |
| <b>10</b> | 2043 (vs)                                                               | 1552 (s)                                                           | 2053 (vs)                                                     | 1556 (m, br, sh at 1575)                                 | 2096 ( $\nu_{\text{as}}$ , vs); 2101 ( $\nu_s$ , m)   |

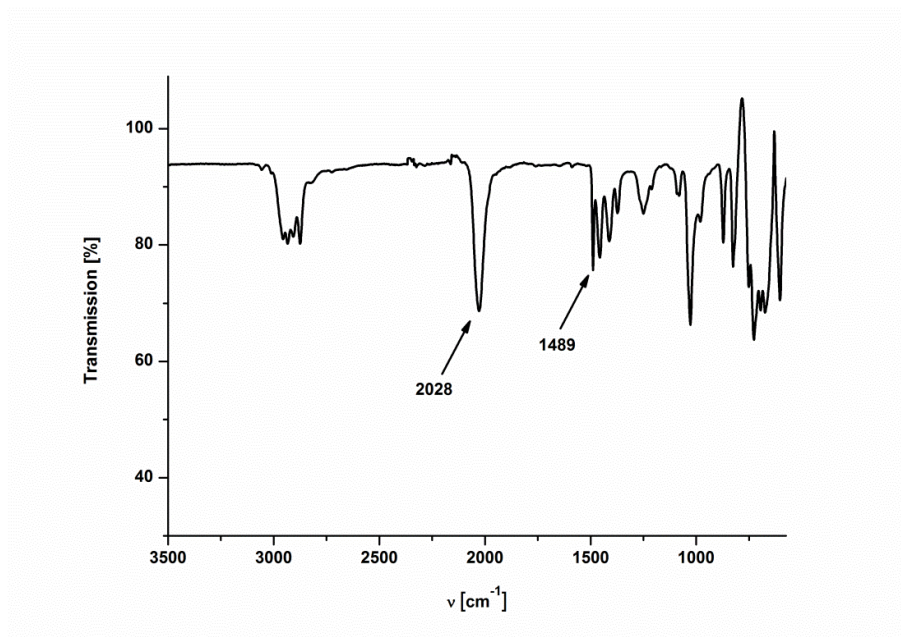

**Figure S56.** IR spectrum (ATR) of **1**

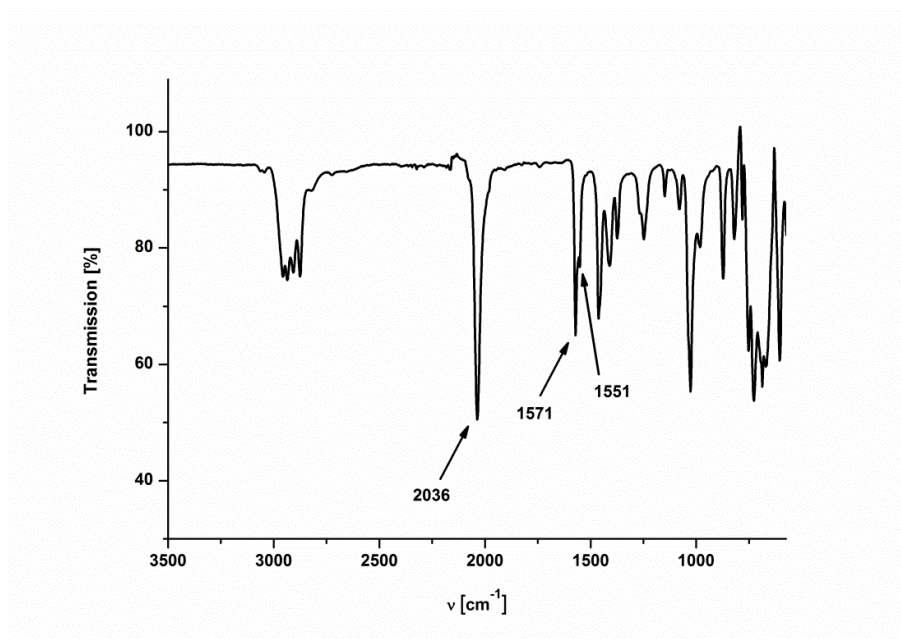

*Figure S57.* IR spectrum (ATR) of **2**

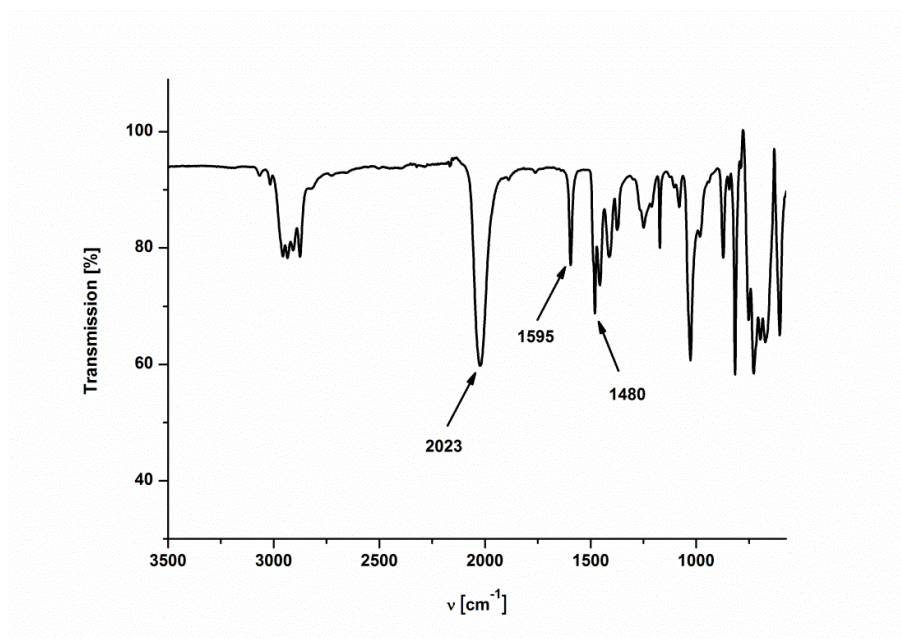

*Figure S58.* IR spectrum (ATR) of **3**

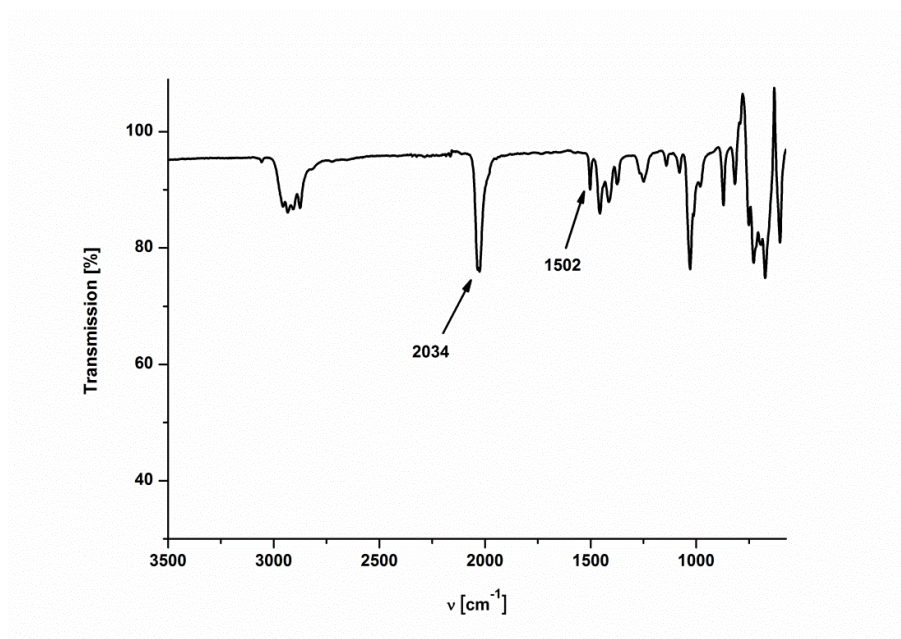

*Figure S59.* IR spectrum (ATR) of **4**

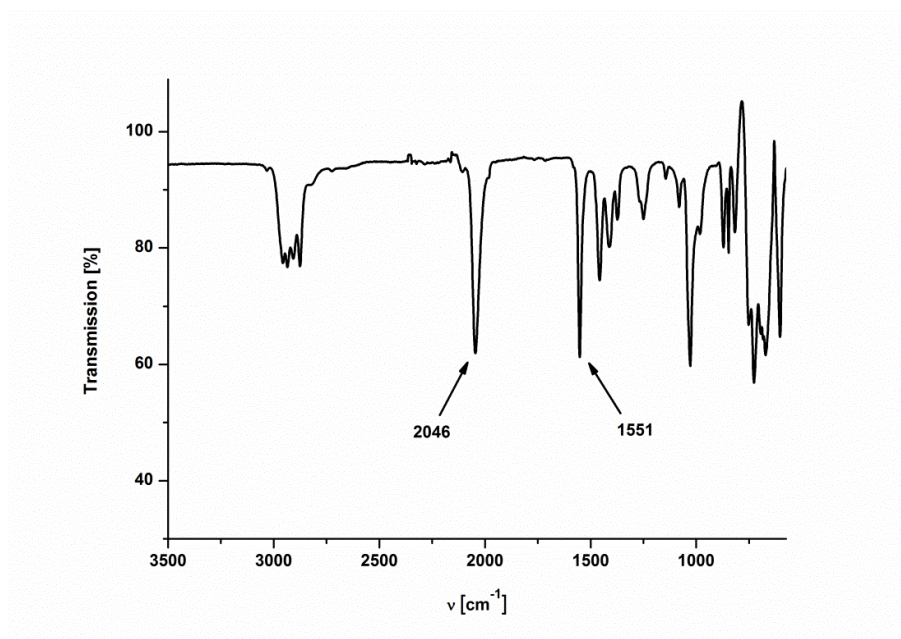

*Figure S60.* IR spectrum (ATR) of **5**



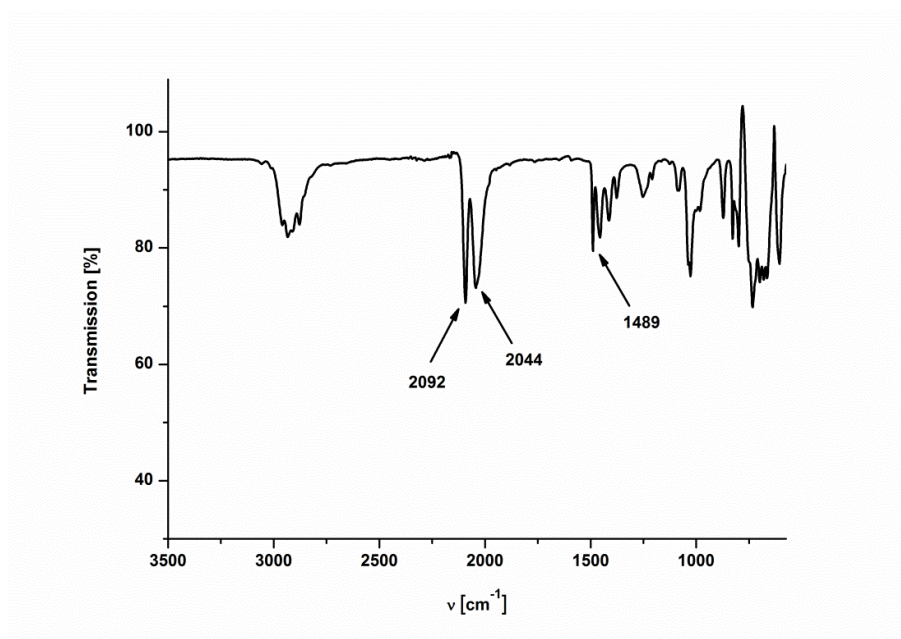

*Figure S61.* IR spectrum (ATR) of **6**

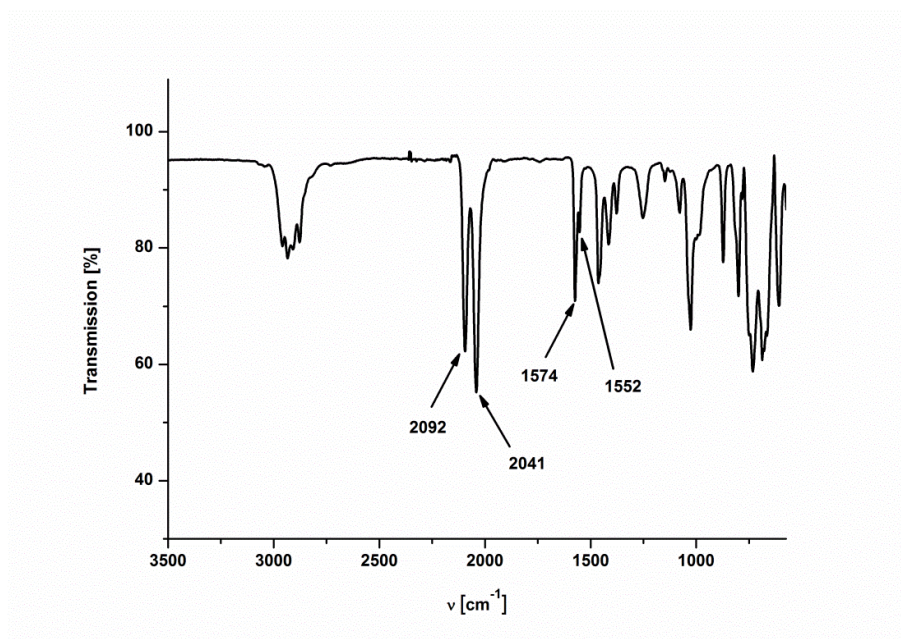

*Figure S62.* IR spectrum (ATR) of **7**



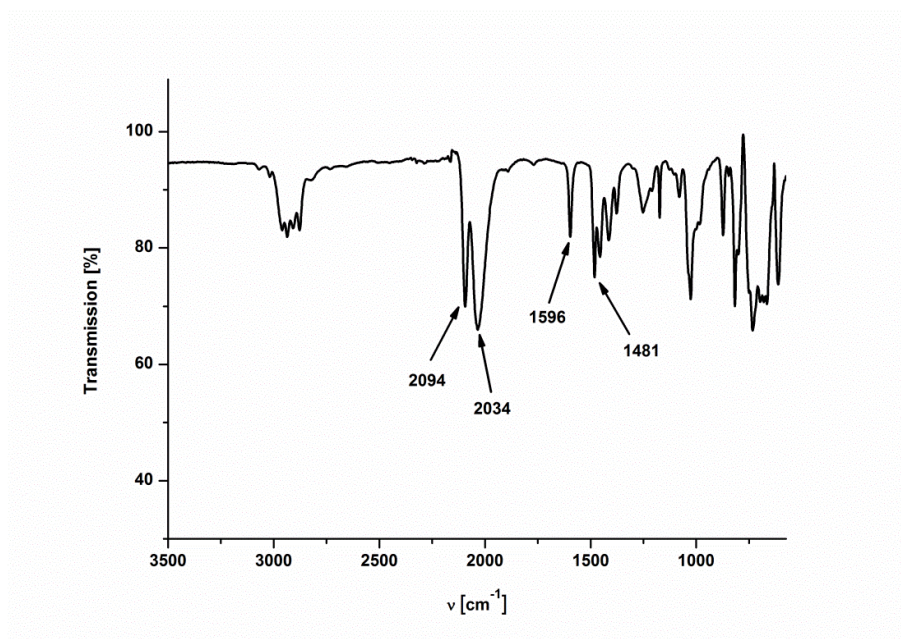

*Figure S63.* IR spectrum (ATR) of **8**

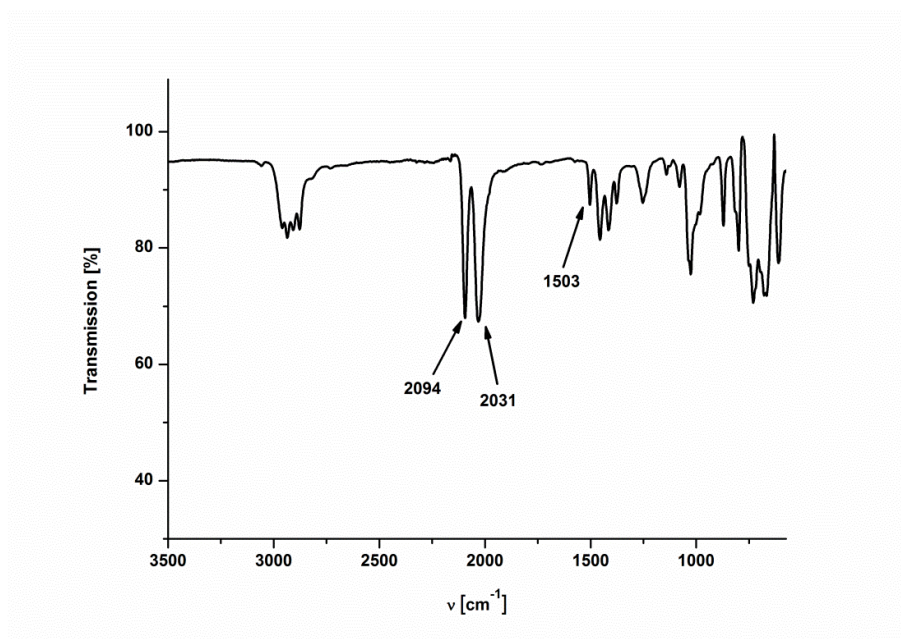

*Figure S64.* IR spectrum (ATR) of **9**

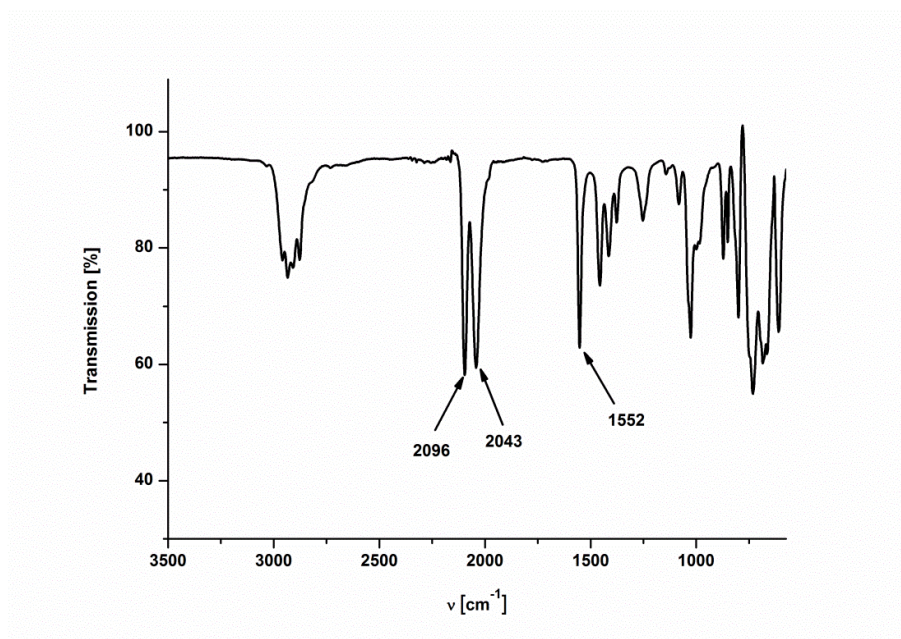

*Figure S65.* IR spectrum (ATR) of **10**

## X-ray diffraction

**Table S2.** Crystallographic data for compounds **1**, **2** and **4**.

|                                                                                                      | <b>1</b>                                                                       | <b>2</b>                                                                       | <b>4</b>                                                                        |
|------------------------------------------------------------------------------------------------------|--------------------------------------------------------------------------------|--------------------------------------------------------------------------------|---------------------------------------------------------------------------------|
| empirical formula                                                                                    | C <sub>50</sub> H <sub>100</sub> Fe <sub>2</sub> I <sub>2</sub> P <sub>8</sub> | C <sub>50</sub> H <sub>100</sub> Fe <sub>2</sub> I <sub>2</sub> P <sub>8</sub> | C <sub>48</sub> H <sub>98</sub> Fe <sub>2</sub> I <sub>2</sub> P <sub>8</sub> S |
| formula weight (g·mol <sup>-1</sup> )                                                                | 1314.56                                                                        | 1314.56                                                                        | 1320.58                                                                         |
| temperature (K)                                                                                      | 153(2)                                                                         | 183(1)                                                                         | 153(2)                                                                          |
| wavelength (Å)                                                                                       | 0.71073                                                                        | 0.71073                                                                        | 0.71073                                                                         |
| crystal system, space group                                                                          | monoclinic, <i>P</i> 2 <sub>1</sub> /c                                         | monoclinic, <i>I</i> 2/a                                                       | monoclinic, <i>P</i> 2 <sub>1</sub> /c                                          |
| <i>a</i> (Å)                                                                                         | 16.5189(4)                                                                     | 16.1604(1)                                                                     | 12.1821(4)                                                                      |
| <i>b</i> (Å)                                                                                         | 9.9102(2)                                                                      | 13.9634(1)                                                                     | 29.8188(10)                                                                     |
| <i>c</i> (Å)                                                                                         | 18.2717(3)                                                                     | 27.1193(2)                                                                     | 19.5967(8)                                                                      |
| $\alpha$ (deg)                                                                                       | 90                                                                             | 90                                                                             | 90                                                                              |
| $\beta$ (deg)                                                                                        | 97.748(2)                                                                      | 100.184(1)                                                                     | 124.521(3)                                                                      |
| $\gamma$ (deg)                                                                                       | 90                                                                             | 90                                                                             | 90                                                                              |
| volume (Å <sup>3</sup> )                                                                             | 2963.87(11)                                                                    | 6023.17(7)                                                                     | 5865.2(4)                                                                       |
| Z, density (calcd) (Mg·m <sup>-3</sup> )                                                             | 2, 1.473                                                                       | 4, 1.450                                                                       | 4, 1.496                                                                        |
| abs coefficient (mm <sup>-1</sup> )                                                                  | 1.779                                                                          | 1.750                                                                          | 1.832                                                                           |
| <i>F</i> (000)                                                                                       | 1356                                                                           | 2712                                                                           | 2720                                                                            |
| crystal size (mm <sup>3</sup> )                                                                      | 0.40 x 0.22 x 0.07                                                             | 0.44 x 0.29 x 0.19                                                             | 0.24 x 0.14 x 0.13                                                              |
| $\theta$ range (deg)                                                                                 | 3.05 to 30.03                                                                  | 2.32 to 30.03                                                                  | 2.73 to 25.03                                                                   |
| reflections collected                                                                                | 47537                                                                          | 62490                                                                          | 31417                                                                           |
| reflections unique                                                                                   | 8570 / <i>R</i> <sub>int</sub> = 0.0459                                        | 8805 / <i>R</i> <sub>int</sub> = 0.0325                                        | 10206 / <i>R</i> <sub>int</sub> = 0.0371                                        |
| completeness to $\theta$ (%)                                                                         | 98.9                                                                           | 100.0                                                                          | 98.3                                                                            |
| absorption correction                                                                                | analytical                                                                     | semi-empirical from equivalents                                                | analytical                                                                      |
| max/min transmission                                                                                 | 0.890 and 0.633                                                                | 1.000 and 0.619                                                                | 0.858 and 0.766                                                                 |
| data / restraints / parameters                                                                       | 7514 / 2 / 308                                                                 | 8162 / 0 / 289                                                                 | 8009 / 74 / 518                                                                 |
| goodness-of-fit on <i>F</i> <sup>2</sup>                                                             | 1.041                                                                          | 1.076                                                                          | 1.032                                                                           |
| final <i>R</i> <sub>1</sub> and <i>wR</i> <sub>2</sub> indices [ <i>I</i> > 2 $\sigma$ ( <i>I</i> )] | 0.0375, 0.0902                                                                 | 0.0235, 0.0602                                                                 | 0.0712, 0.1803                                                                  |
| <i>R</i> <sub>1</sub> and <i>wR</i> <sub>2</sub> indices (all data)                                  | 0.0454, 0.0985                                                                 | 0.0263, 0.0625                                                                 | 0.0899, 0.1965                                                                  |
| largest diff. peak and hole (e·Å <sup>-3</sup> )                                                     | 2.722 and -1.061                                                               | 0.745 and -0.588                                                               | 1.790 and -1.777                                                                |

*The unweighted R-factor is  $R_1 = \sum(F_o - F_c)/\sum F_o$ ;  $I > 2\sigma(I)$  and the weighted R-factor is  $wR_2 = \{\sum w(F_o^2 - F_c^2)^2 / \sum w(F_o^2)^2\}^{1/2}$*

**Table S3.** Crystallographic data for compounds **5**, **6**, **8** and **9**.

|                                                                                                      | <b>5</b>                                                                                                                 | <b>6</b>                                                                                                                               | <b>8</b>                                                                                      | <b>9</b>                                                                                     |
|------------------------------------------------------------------------------------------------------|--------------------------------------------------------------------------------------------------------------------------|----------------------------------------------------------------------------------------------------------------------------------------|-----------------------------------------------------------------------------------------------|----------------------------------------------------------------------------------------------|
| empirical formula                                                                                    | C <sub>72</sub> H <sub>147</sub> Fe <sub>3</sub> I <sub>3</sub> P <sub>12</sub> ,<br>0.5(C <sub>6</sub> H <sub>6</sub> ) | C <sub>52</sub> H <sub>100</sub> Fe <sub>2</sub> N <sub>2</sub> P <sub>8</sub> S <sub>2</sub> ,<br>2(C <sub>6</sub> H <sub>5</sub> Cl) | C <sub>58</sub> H <sub>104</sub> Fe <sub>2</sub> N <sub>2</sub> P <sub>8</sub> S <sub>2</sub> | C <sub>50</sub> H <sub>98</sub> Fe <sub>2</sub> N <sub>2</sub> P <sub>8</sub> S <sub>3</sub> |
| formula weight (g·mol <sup>-1</sup> )                                                                | 1971.83                                                                                                                  | 1402.02                                                                                                                                | 1253.01                                                                                       | 1182.98                                                                                      |
| temperature (K)                                                                                      | 120(2)                                                                                                                   | 183(1)                                                                                                                                 | 183(1)                                                                                        | 183(1)                                                                                       |
| wavelength (Å)                                                                                       | 1.54184                                                                                                                  | 0.71073                                                                                                                                | 0.71073                                                                                       | 0.71073                                                                                      |
| crystal system, space group                                                                          | monoclinic, <i>P</i> 2 <sub>1</sub> /c                                                                                   | monoclinic, <i>P</i> 2 <sub>1</sub> /c                                                                                                 | orthorhombic, <i>P</i> b c a                                                                  | monoclinic, <i>P</i> 2 <sub>1</sub> /c                                                       |
| <i>a</i> (Å)                                                                                         | 16.5273(5)                                                                                                               | 9.4939(6)                                                                                                                              | 12.3808(2)                                                                                    | 17.8328(4)                                                                                   |
| <i>b</i> (Å)                                                                                         | 28.5966(10)                                                                                                              | 12.9379(5)                                                                                                                             | 17.8464(2)                                                                                    | 20.0399(4)                                                                                   |
| <i>c</i> (Å)                                                                                         | 20.0805(7)                                                                                                               | 29.598(2)                                                                                                                              | 29.4377(4)                                                                                    | 18.9596(4)                                                                                   |
| $\alpha$ (deg)                                                                                       | 90                                                                                                                       | 90                                                                                                                                     | 90                                                                                            | 90                                                                                           |
| $\beta$ (deg)                                                                                        | 101.221(4)                                                                                                               | 90.369(6)                                                                                                                              | 90                                                                                            | 117.489(3)                                                                                   |
| $\gamma$ (deg)                                                                                       | 90                                                                                                                       | 90                                                                                                                                     | 90                                                                                            | 90                                                                                           |
| volume (Å <sup>3</sup> )                                                                             | 9309.1(6)                                                                                                                | 3635.5(4)                                                                                                                              | 6504.34(16)                                                                                   | 6010.6(2)                                                                                    |
| <i>Z</i> , density (calcd) (Mg·m <sup>-3</sup> )                                                     | 4, 1.407                                                                                                                 | 2, 1.281                                                                                                                               | 4, 1.280                                                                                      | 4, 1.307                                                                                     |
| abs coefficient (mm <sup>-1</sup> )                                                                  | 13.729                                                                                                                   | 0.744                                                                                                                                  | 0.744                                                                                         | 0.834                                                                                        |
| <i>F</i> (000)                                                                                       | 4068                                                                                                                     | 1492                                                                                                                                   | 2680                                                                                          | 2528                                                                                         |
| crystal size (mm <sup>3</sup> )                                                                      | 0.20 x 0.10 x 0.03                                                                                                       | 0.30 x 0.11 x 0.04                                                                                                                     | 0.45 x 0.34 x 0.04                                                                            | 0.35 x 0.07 x 0.01                                                                           |
| $\theta$ range (deg)                                                                                 | 2.72 to 68.25                                                                                                            | 2.56 to 25.35                                                                                                                          | 2.12 to 30.40                                                                                 | 2.37 to 28.78                                                                                |
| reflections collected                                                                                | 50707                                                                                                                    | 20403                                                                                                                                  | 43906                                                                                         | 69260                                                                                        |
| reflections unique                                                                                   | 17043 / <i>R</i> <sub>int</sub> = 0.1258                                                                                 | 6596 / <i>R</i> <sub>int</sub> = 0.0696                                                                                                | 8994 / <i>R</i> <sub>int</sub> = 0.0286                                                       | 13916 / <i>R</i> <sub>int</sub> = 0.0582                                                     |
| completeness to $\theta$ (%)                                                                         | 99.9                                                                                                                     | 98.9                                                                                                                                   | 100.0                                                                                         | 99.9                                                                                         |
| absorption correction                                                                                | semi-empirical from<br>equivalents                                                                                       | analytical                                                                                                                             | analytical                                                                                    | analytical                                                                                   |
| max/min transmission                                                                                 | 1.000 and 0.368                                                                                                          | 0.967 and 0.850                                                                                                                        | 0.980 and 0.853                                                                               | 0.991 and 0.851                                                                              |
| data / restraints / parameters                                                                       | 7144 / 128 / 248                                                                                                         | 4869 / 110 / 366                                                                                                                       | 7387 / 36 / 371                                                                               | 10152 / 84 / 578                                                                             |
| goodness-of-fit on <i>F</i> <sup>2</sup>                                                             | 1.114                                                                                                                    | 1.021                                                                                                                                  | 1.023                                                                                         | 1.131                                                                                        |
| final <i>R</i> <sub>1</sub> and <i>wR</i> <sub>2</sub> indices [ <i>I</i> > 2 $\sigma$ ( <i>I</i> )] | 0.1298, 0.3467                                                                                                           | 0.0598, 0.1362                                                                                                                         | 0.0392, 0.0920                                                                                | 0.1044, 0.2110                                                                               |
| <i>R</i> <sub>1</sub> and <i>wR</i> <sub>2</sub> indices (all data)                                  | 0.2208, 0.4288                                                                                                           | 0.0865, 0.1536                                                                                                                         | 0.0513, 0.0992                                                                                | 0.1383, 0.2259                                                                               |
| largest diff. peak and hole (e·Å <sup>-3</sup> )                                                     | 3.537 and -1.500                                                                                                         | 0.654 and -0.628                                                                                                                       | 0.947 and -0.464                                                                              | 1.126 and -1.421                                                                             |

The unweighted *R*-factor is  $R_1 = \sum(F_o - F_c) / \sum F_o$ ;  $I > 2\sigma(I)$  and the weighted *R*-factor is  $wR_2 = \{\sum w(F_o^2 - F_c^2)^2 / \sum w(F_o^2)^2\}^{1/2}$

**Table S4.** Selected bond lengths [Å], non-bonding distances [Å] and angles [°] of compounds **1**, **2**, **4**, **6**, **8** and **9**.

|                                  | <b>1</b>                             | <b>2</b>                             | <b>4</b>                                                           | <b>6</b>                             | <b>8</b>                             | <b>9</b>                                                         |
|----------------------------------|--------------------------------------|--------------------------------------|--------------------------------------------------------------------|--------------------------------------|--------------------------------------|------------------------------------------------------------------|
| <b>Space group</b>               | <i>P</i> 2 <sub>1</sub> /c           | <i>I</i> 2/a                         | <i>P</i> 2 <sub>1</sub> /c                                         | <i>P</i> 2 <sub>1</sub> /c           | <i>P</i> bca                         | <i>P</i> 2 <sub>1</sub> /c                                       |
| <b>Bond lengths [Å]</b>          | <b>Fe1-C1</b><br>1.883(2)            | <b>Fe1-C1</b><br>1.8862(14)          | <b>Fe1-C1</b><br>1.868(4)<br><b>Fe2-C8</b><br>1.889(4)             | <b>Fe1-C2</b><br>1.899(4)            | <b>Fe1-C2</b><br>1.8991(16)          | <b>Fe1-C22</b><br>1.891(6)<br><b>Fe2-C29</b><br>1.893(7)         |
|                                  | <b>C1-C2</b><br>1.218(4)             | <b>C1-C2</b><br>1.220(2)             | <b>C1-C2</b><br>1.226(6)<br><b>C8-C7</b><br>1.210(6)               | <b>C2-C3</b><br>1.221(5)             | <b>C2-C3</b><br>1.217(2)             | <b>C22-C23</b><br>1.220(9)<br><b>C29-C28</b><br>1.211(10)        |
|                                  | <b>C2-C3</b><br>1.433(3)             | <b>C2-C3</b><br>1.4329(19)           | <b>C2-C3</b><br>1.408(6)<br><b>C7-C6</b><br>1.415(6)               | <b>C3-C4</b><br>1.441(5)             | <b>C3-C4</b><br>1.435(2)             | <b>C23-C24</b><br>1.417(9)<br><b>C28-C27</b><br>1.424(9)         |
|                                  | <b>Fe1-I1</b><br>2.6907(4)           | <b>Fe1-I1</b><br>2.7026(2)           | <b>Fe1-I1A</b><br>2.7146(9)<br><b>Fe2-I2A</b><br>2.7065(9)         | <b>Fe1-N1</b><br>1.953(3)            | <b>Fe1-N1</b><br>1.9534(14)          | <b>Fe1-N1</b><br>1.965(6)<br><b>Fe2-N2</b><br>1.964(6)           |
|                                  | ---                                  | ---                                  | ---                                                                | <b>N1-C1</b><br>1.160(5)             | <b>N1-C1</b><br>1.150(2)             | <b>N1-C1</b><br>1.119(8)<br><b>N2-C30</b><br>1.121(8)            |
|                                  | ---                                  | ---                                  | ---                                                                | <b>C1-S1</b><br>1.645(4)             | <b>C1-S1</b><br>1.6405(18)           | <b>C1-S1</b><br>1.673(7)<br><b>C30-S2</b><br>1.661(7)            |
|                                  | <b>Fe-P</b><br>2.254(2) <sup>a</sup> | <b>Fe-P</b><br>2.252(4) <sup>a</sup> | <b>Fe-P</b><br>2.251(11) <sup>a</sup>                              | <b>Fe-P</b><br>2.262(6) <sup>a</sup> | <b>Fe-P</b><br>2.253(3) <sup>a</sup> | <b>Fe-P</b><br>2.252(4) <sup>a</sup>                             |
| <b>Non-bonding distances [Å]</b> | <b>Fe1...Fe1'</b><br>11.8981(2)      | <b>Fe1...Fe1'</b><br>9.7504(3)       | <b>Fe1...Fe2</b><br>11.1638(9)                                     | <b>Fe1...Fe1'</b><br>11.9343(10)     | <b>Fe1...Fe1'</b><br>16.2610(4)      | <b>Fe1...Fe2</b><br>11.2517(15)                                  |
|                                  | ---                                  | ---                                  | ---                                                                | <b>S1...S1'</b><br>21.4257(21)       | <b>S1...S1'</b><br>25.6847(11)       | <b>S1...S2</b><br>20.610(4)                                      |
| <b>Bond angles [°]</b>           | ---                                  | ---                                  | ---                                                                | <b>S1-C1-N1</b><br>179.7(4)          | <b>S1-C1-N1</b><br>178.85(18)        | <b>S1-C1-N1</b><br>177.9(6)<br><b>S2-C30-N2</b><br>178.2(7)      |
|                                  | ---                                  | ---                                  | ---                                                                | <b>C1-N1-Fe1</b><br>173.5(3)         | <b>C1-N1-Fe1</b><br>176.56(15)       | <b>C1-N1-Fe1</b><br>173.1(5)<br><b>C30-N2-Fe2</b><br>174.1(6)    |
|                                  | <b>I1-Fe1-C1</b><br>176.98(8)        | <b>I1-Fe1-C1</b><br>178.90(4)        | <b>I1A-Fe1-C1</b><br>175.88(14)<br><b>I2A-Fe2-C8</b><br>177.37(16) | <b>N1-Fe1-C2</b><br>179.08(14)       | <b>N1-Fe1-C2</b><br>178.58(7)        | <b>N1-Fe1-C22</b><br>178.0(3)<br><b>N2-Fe2-C29</b><br>177.1(3)   |
|                                  | <b>Fe1-C1-C2</b><br>176.6(2)         | <b>Fe1-C1-C2</b><br>177.21(13)       | <b>Fe1-C1-C2</b><br>179.2(4)<br><b>Fe2-C8-C7</b><br>176.2(4)       | <b>Fe1-C2-C3</b><br>177.4(3)         | <b>Fe1-C2-C3</b><br>177.61(16)       | <b>Fe1-C22-C23</b><br>179.1(6)<br><b>Fe2-C29-C28</b><br>177.8(8) |
|                                  | <b>C1-C2-C3</b><br>176.5(3)          | <b>C1-C2-C3</b><br>172.67(15)        | <b>C1-C2-C3</b><br>176.0(4)<br><b>C8-C7-C6</b><br>175.2(5)         | <b>C2-C3-C4</b><br>175.9(4)          | <b>C2-C3-C4</b><br>176.4(2)          | <b>C22-C23-C24</b><br>175.6(7)<br><b>C29-C28-C27</b><br>177.3(9) |

<sup>a</sup> Mean bond length: the estimated standard uncertainty  $u$  of the mean is calculated from the equation  $u^2 = \frac{1}{n(n-1)} \sum_{i=1}^n (x_i - \bar{x})^2$  for a set of  $n$  values where  $x_i$  is the  $i$ th value and  $\bar{x}$  is the mean of the  $n$  results considered.

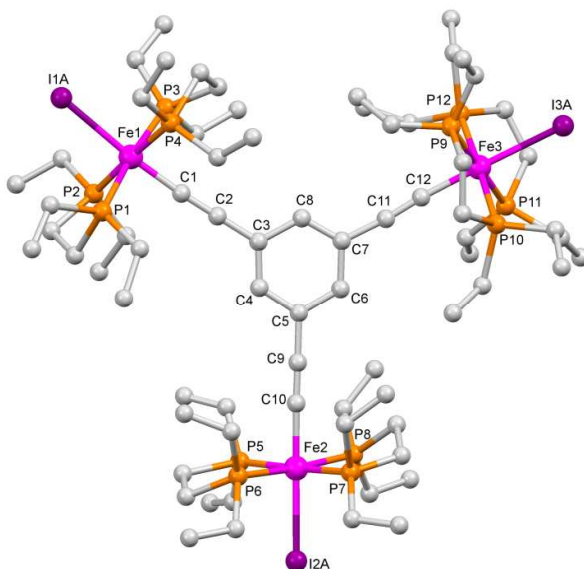

**Figure S66.** Molecular structures of: **5**. Solvent molecules and selected hydrogen atoms are omitted for clarity.

#### Refinement details.

In the crystal structure of **1**, one ethyl group is disordered over two sets of positions with site-occupancy factors of 0.253(9) and 0.747(9). Some bond distance restraints were used to correct the geometry of the disordered components. All non-hydrogen atoms were refined anisotropically. All hydrogen positions were calculated after each cycle of refinement using a riding model, with C—H = 0.93 Å and  $U_{\text{iso}}(\text{H}) = 1.2U_{\text{eq}}(\text{C})$  for aromatic H atoms, with C—H = 0.97 Å and  $U_{\text{iso}}(\text{H}) = 1.2U_{\text{eq}}(\text{C})$  for methylene H atoms, and with C—H = 0.96 Å and  $U_{\text{iso}}(\text{H}) = 1.5U_{\text{eq}}(\text{C})$  for methyl H atoms.

In the crystal structure of **2**, the molecule lies on a two-fold rotation axis that passes through the substituted benzene ring (symmetry code:  $i = -x-1/2, y, -z$ ). All non-hydrogen atoms were refined anisotropically. All hydrogen positions were calculated after each cycle of refinement using a riding model, with C—H = 0.93 Å and  $U_{\text{iso}}(\text{H}) = 1.2U_{\text{eq}}(\text{C})$  for the aromatic H atoms, with C—H = 0.97 Å and  $U_{\text{iso}}(\text{H}) = 1.2U_{\text{eq}}(\text{C})$  for the methylene H atoms, and with C—H = 0.96 Å and  $U_{\text{iso}}(\text{H}) = 1.5U_{\text{eq}}(\text{C})$  for the methyl H atoms.

In the crystal structure of **4**, the main residue is disordered at 69% (as calculated in the checkCIF report). The central part of the molecule Fe—C<sub>2</sub>—C<sub>4</sub>H<sub>2</sub>S—C<sub>2</sub>—Fe is not disordered which makes the determination unambiguous. The selected crystal was clearly a monocrystal: 99.7% of the diffraction peaks fit with the cell parameters. No merohedral twinning is observed. The depe ligand containing P1 and P2 is partially disordered over two sets of positions with site-occupancy factors of 0.354(5) and 0.646(5), while the depe ligand containing P3 and P4 is fully disordered (except the P atoms) over two sets of positions with site-occupancy factors of 0.492(5) and 0.508(5). The depe ligands coordinated to Fe2 are fully disordered, P atoms included, with a relative occupancy of 0.414:0.586(2). The P6 and P8 atoms are also modeled with a 2-position disorder (despite a nearly perfect overlap of the atoms) in order to get bond distances and angles as reasonable as possible. The I atoms were also treated as disordered with site-occupancy ratios of 0.3973:0.6027(13) for I1 and 0.4508:0.5492(16) for I2. We did choose to disorder the I atoms to get rid of large residual peaks around the I positions (5.50 and 5.04 e<sup>−</sup> Å<sup>−3</sup> at 1.46 and 0.90 Å from I1 and I2, respectively) which resulted in better final R values by about 3%. A total number of 74 restraints had to be used to correct the geometry of the disordered components of the molecule and the thermal parameters of the corresponding atoms. All non-hydrogen atoms were refined anisotropically. All hydrogen positions were calculated after each cycle of refinement using a riding model, with C—H = 0.93 Å and  $U_{\text{iso}}(\text{H}) = 1.2U_{\text{eq}}(\text{C})$  for aromatic H atoms, with C—H = 0.97 Å and  $U_{\text{iso}}(\text{H}) = 1.2U_{\text{eq}}(\text{C})$  for methylene H atoms, and with C—H = 0.96 Å and  $U_{\text{iso}}(\text{H}) = 1.5U_{\text{eq}}(\text{C})$  for methyl H atoms.

In the crystal structure of **5**, only the main core of the molecule, C<sub>12</sub>Fe<sub>3</sub>, did not show any disorder. The whole molecule appeared clearly with most of the structure solution programs. Unfortunately, attempts to refine the model with a site-

occupancy of 1 for all atoms resulted to very large isotropic parameters. The *depe* ligand is well known to exhibit disorders, sometimes even all atoms of the ligand are disordered, it seems to be the case here for all three *depe* ligands. The fact that the crystal and the data collection were of a good quality, and that the non-disordered core confirms the expected molecule, we did refine the crystal structure of the compound to present the result in the Supporting Information (Appendix). First, the main core including the P and I atoms were freely refined, and then all C positions were located in Fourier difference maps, their xyz coordinates and isotropic parameters were fixed ( $U_{\text{iso}} = 0.08$  for the ethane bridge C atoms,  $U_{\text{iso}} = 0.10$  for the methylene C atoms of the ethyl groups, and  $U_{\text{iso}} = 0.015$  for the methyl C atoms of the ethyl groups). Restraints had to be used to correct the geometry of some parts of the molecules, but we tried to check systematically bond distances and angles to unfix as many coordinates as possible. The Fe, I, P atoms as well as the central 12 C atoms were anisotropically refined. All hydrogen positions were calculated after each cycle of refinement using a riding model, with C—H = 0.93 Å and  $U_{\text{iso}}(\text{H}) = 1.2U_{\text{eq}}(\text{C})$  for aromatic H atoms, with C—H = 0.97 Å and  $U_{\text{iso}}(\text{H}) = 1.2U_{\text{eq}}(\text{C})$  for methylene H atoms, and with C—H = 0.96 Å and  $U_{\text{iso}}(\text{H}) = 1.5U_{\text{eq}}(\text{C})$  for methyl H atoms.

In the crystal structure of **6**, the dinuclear species lies on an inversion center located in the middle of the central benzene ring (symmetry code:  $i = -x+1, -y, -z+1$ ). It cocrystallized with solvent molecules of chlorobenzene in a ratio 1:2. The terminal  $\text{CH}_3$  group of one ethyl ligand is disordered over two sets of positions with site-occupancy factors of 0.367(9) and 0.633(9). Some restraints had to be used to correct the geometry of the disordered parts and the thermal parameters of the corresponding atoms. All non-hydrogen atoms were refined anisotropically. All hydrogen positions were calculated after each cycle of refinement using a riding model, with C—H = 0.93 Å and  $U_{\text{iso}}(\text{H}) = 1.2U_{\text{eq}}(\text{C})$  for aromatic H atoms, with C—H = 0.97 Å and  $U_{\text{iso}}(\text{H}) = 1.2U_{\text{eq}}(\text{C})$  for methylene H atoms, and with C—H = 0.96 Å and  $U_{\text{iso}}(\text{H}) = 1.5U_{\text{eq}}(\text{C})$  for methyl H atoms.

In the crystal structure of **8**, the dinuclear species lie on a center of inversion located in the middle of the central C—C bond. The second part of the molecule is obtained by a symmetry operation ( $-1-x, -y, -z$ ). Two ethyl ligands are disordered over two sets of positions with site occupancy ratios of 0.495(8):0.505 (8) and 0.220(4):0.780 (4). All hydrogen positions were calculated after each cycle of refinement using a riding model, with C—H = 0.93 Å and  $U_{\text{iso}}(\text{H}) = 1.2U_{\text{eq}}(\text{C})$  for aromatic H atoms, with C—H = 0.97 Å and  $U_{\text{iso}}(\text{H}) = 1.2U_{\text{eq}}(\text{C})$  for methylene H atoms, and with C—H = 0.96 Å and  $U_{\text{iso}}(\text{H}) = 1.5U_{\text{eq}}(\text{C})$  for methyl H atoms.

In the crystal structure of **9**, the diphosphine ligands bound to  $\text{Fe}_2$  are fully disordered over two sets of positions with a refined site-occupancy ratio of 0.413:0.587(4). Many restraints and constraints (84 vs. 584 parameters) had to be used to correct the geometry of the disordered components and the thermal parameters of the corresponding atoms. All hydrogen positions were calculated after each cycle of refinement using a riding model, with C—H = 0.93 Å and  $U_{\text{iso}}(\text{H}) = 1.2U_{\text{eq}}(\text{C})$  for aromatic H atoms, with C—H = 0.97 Å and  $U_{\text{iso}}(\text{H}) = 1.2U_{\text{eq}}(\text{C})$  for methylene H atoms, and with C—H = 0.96 Å and  $U_{\text{iso}}(\text{H}) = 1.5U_{\text{eq}}(\text{C})$  for methyl H atoms.

### Cyclic Voltammetry Studies

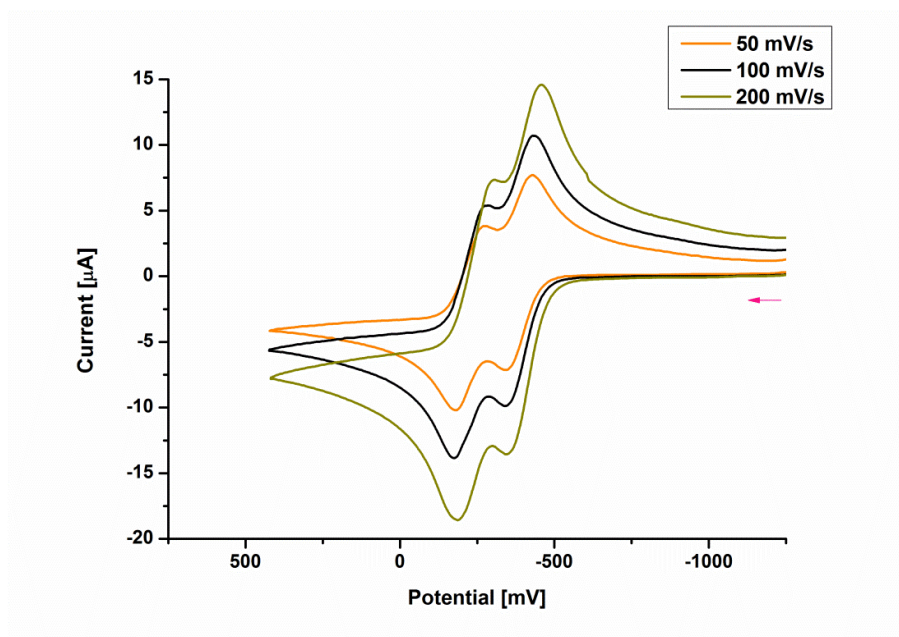

**Figure S67.** Cyclic voltammograms for **1** in  $\text{NBu}_4\text{PF}_6$  (0.1M) at three different chart rates; rt, Au electrode; E vs.  $\text{Fc}^{0/+}$  (external)

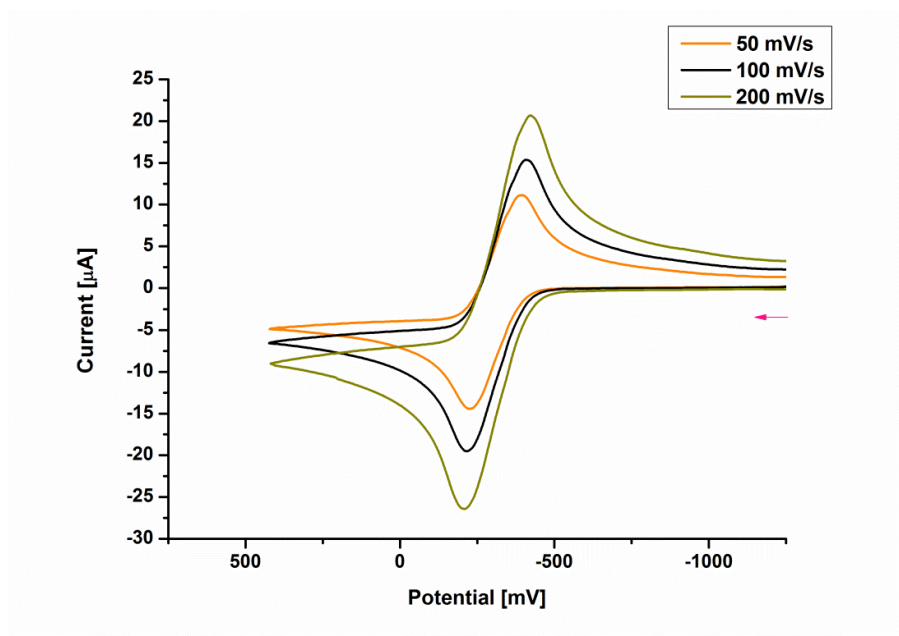

**Figure S68.** Cyclic voltammograms for **2** in  $\text{NBu}_4\text{PF}_6$  (0.1M) at three different chart rates; rt, Au electrode; E vs.  $\text{Fc}^{0/+}$  (external)



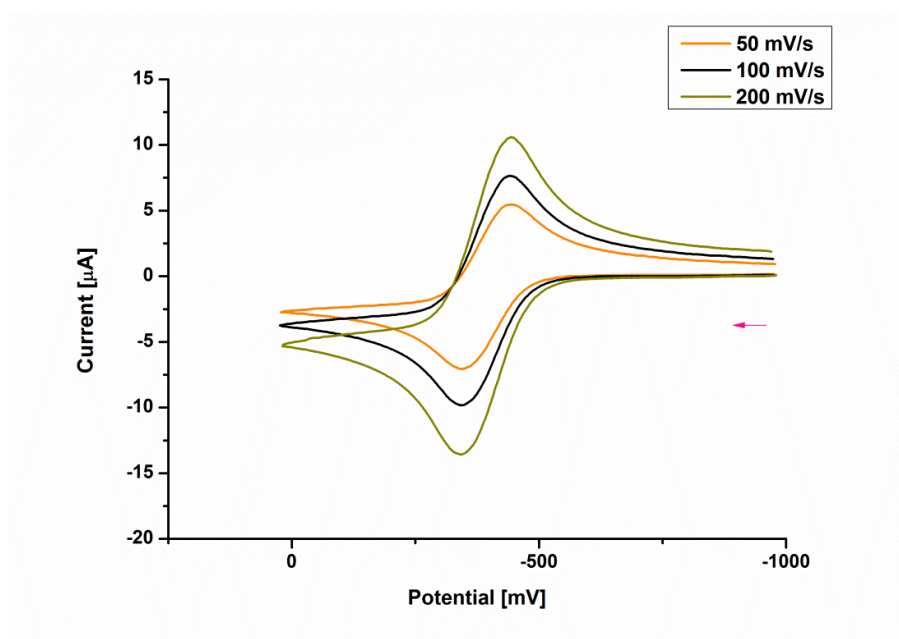

**Figure S69.** Cyclic voltammograms for **3** in  $\text{NBu}_4\text{PF}_6$  (0.1M) at three different chart rates; rt, Au electrode; E vs.  $\text{Fc}^{o/+}$  (external)

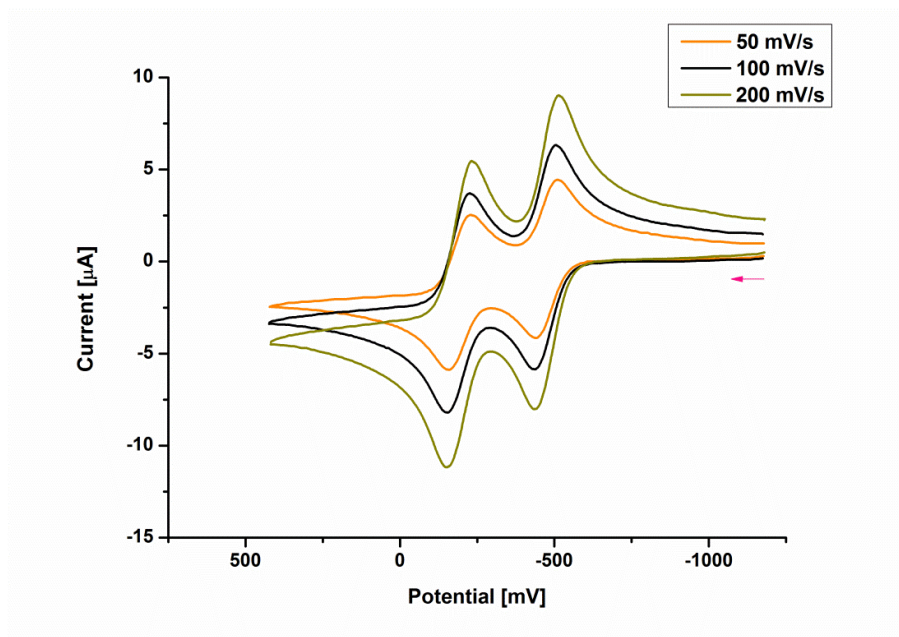

**Figure S70.** Cyclic voltammograms for **4** in  $\text{NBu}_4\text{PF}_6$  (0.1M) at three different chart rates; rt, Au electrode; E vs.  $\text{Fc}^{o/+}$  (external)

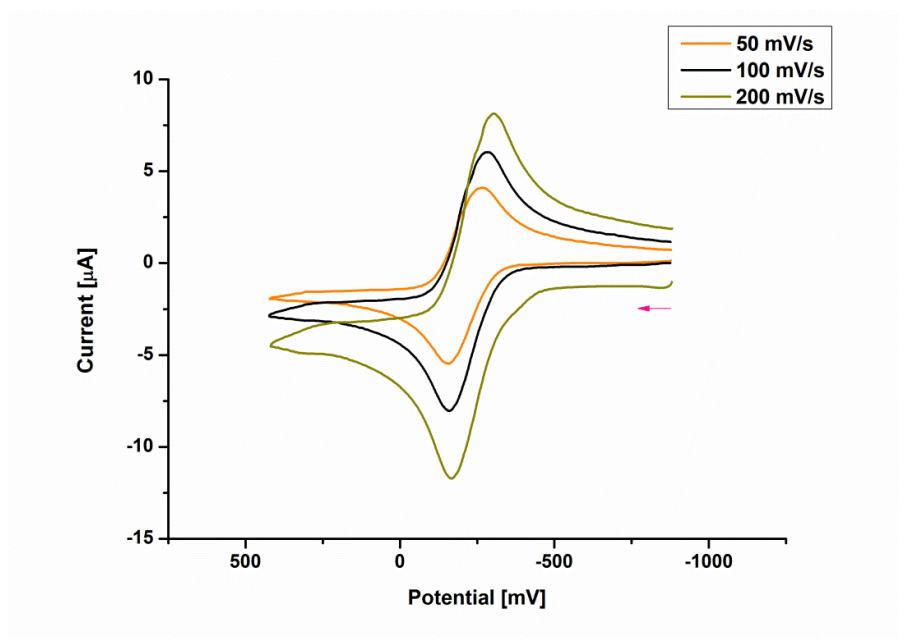

**Figure S71.** Cyclic voltammograms for **5** in  $\text{NBu}_4\text{PF}_6$  (0.1M) at three different chart rates; rt, Au electrode; E vs.  $\text{Fc}^{o/+}$  (external)

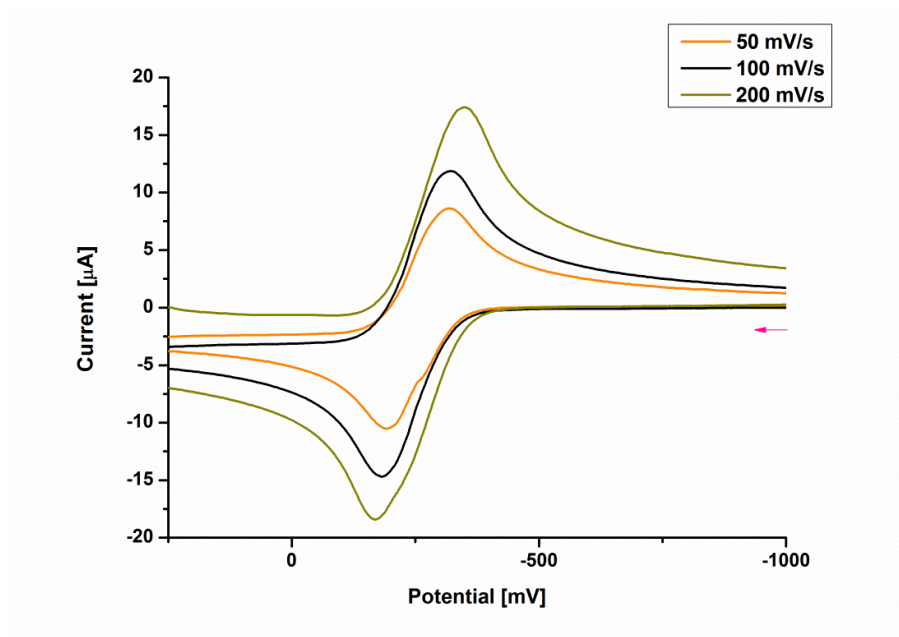

**Figure S72.** Cyclic voltammograms for **8** in  $\text{NBu}_4\text{PF}_6$  (0.1M) at three different chart rates; rt, Au electrode; E vs.  $\text{Fc}^{o/+}$  (external)

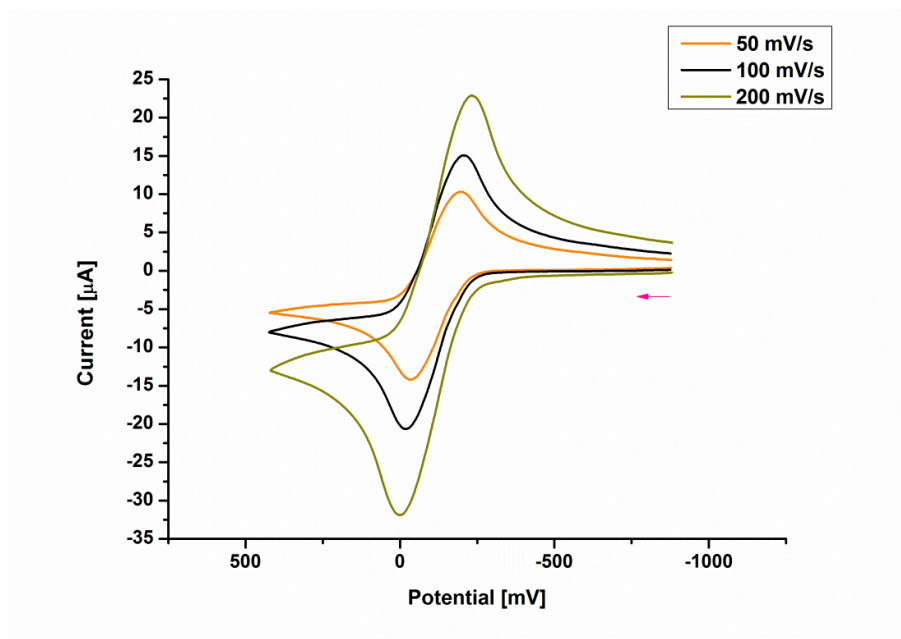

**Figure S73.** Cyclic voltammograms for **10** in  $\text{NBu}_4\text{PF}_6$  (0.1M) at three different chart rates; rt, Au electrode; E vs.  $\text{Fc}^{\text{ox/}}/{}^{\text{red}}$  (external)

## DFT Calculations

**Table S5.** Composition (%) of the HOMO of the calculated species model complexes **6-Me**, **7-Me**, **8-Me**, **9-Me** and of the C<sub>4</sub> bridged **C-Me** computed at the PBE1PBE/LANL2DZ//PBE1PBE/6-311+g(d) level.

|          | Fe | C <sub>4</sub> | C <sub>4</sub> | bridge | NCS |
|----------|----|----------------|----------------|--------|-----|
| <b>6</b> | 14 | 12             | 7              | 61     | 5   |
| <b>7</b> | 16 | 6              | 6              | 45     | 12  |
| <b>8</b> | 13 | 8              | 7              | 62     | 6   |
| <b>9</b> | 10 | 15             | 5              | 73     | 2   |
| <b>C</b> | 16 | 16             | 11             | 53     | 7   |

## References

- (1) Lissel, F.; Fox, T.; Blacque, O.; Polit, W.; Winter, R. F.; Venkatesan, K.; Berke, H. *J. Am. Chem. Soc.* **2013**, *135* (10), 4051–4060
- (2) Fulmer, G. R.; Miller, A. J. M.; Sherden, N. H.; Gottlieb, H. E.; Nudelman, A.; Stoltz, B. M.; Bercaw, J. E.; Goldberg, K. I. *Organometallics*. **2010**, *29* (9), 2176–2179.
